# Supplementary material
Source: publisher figshare collection journal article supplement (https://sage.figshare.com/ndownloader/files/14441402)
Supplement: Supplementary file 1 [file 14441402]

# The Decline in Earnings of Childhood Immigrants in the United States: Online Appendix, Female Immigrants

This online appendix repeats all results, including the appendix and web appendix, of the article but for female childhood immigrants. The comparison group is now female natives, but otherwise the results are constructed in the same way. In particular, parental skills continue to be measured using male adult immigrants from the same birthplace who arrived during the same time period.

The main results observed for male childhood immigrants hold for female childhood immigrants as well. Notably, I observe large, negative cohort effects in earnings of female childhood immigrants (Table 4), which disappear when controls for parental skills (earnings and educational attainment) are included (Table 7).

However, there are some notable differences that I briefly highlight here. First, while both male and female childhood immigrants have experienced declining age-adjusted earnings relative to natives, female childhood immigrants tend to do better relative to female natives than male childhood immigrants relative to male natives (Table 2). In other words, the earnings gaps tend to be smaller for female than for male childhood immigrants. Second, while for male childhood immigrants, the negative cohort effects essentially level off after the late-1980s arrival cohort, female childhood immigrants experienced a further deterioration in their cohort effect between the 1985-89 and 1995-99 arrival cohorts (Table 4). Third, the negative cohort effects in earnings can only partly be explained by birthplace, education, and English proficiency controls for female childhood immigrants (Table 4). This finding is in contrast with male childhood immigrants, where these controls can explain nearly all the negative cohort effects. In fact, sizable, negative cohort effects remain for female childhood immigrants even in the presence of education, English, and birthplace controls.

Fourth, while negative cohort effects in educational attainment are present for the female sample, the negative English proficiency effects are much smaller for women than men (Table 5). Fifth, though parental earnings for both male and female childhood immigrants are the same for each birthplace-cohort, since they are measured based on adult male immigrants (i.e., potential fathers), the actual mean parental skills - both earnings and educational attainment - of working female childhood immigrants exceeds those of male childhood immigrants in each cohort (Table 6). This finding is consistent with a more positive relationship between the characteristics of the parental cohort (i.e., earnings and educational attainment) and the labor-force participation of female childhood immigrants than between the characteristics of the parental cohort and the labor-force participation of male childhood immigrants.[[1]](#footnote-1) Also, the decline in parental skills across cohorts has been less severe for female than for male childhood immigrants.

Finally, and perhaps the most notable difference between male and female childhood immigrants, is the size of the parental educational attainment coefficient in the results in Table 10. In other words, I find evidence that the intergenerational correlation between parental education and childhood immigrant earnings is stronger for female than for male childhood immigrants. This result helps reconcile the apparent inconsistency that a) the negative cohort effects of female childhood immigrants exceeds those of male childhood immigrants, yet b) the decline in parental skills of female childhood immigrants has been less severe than that for male childhood immigrants.

# Main Tables

Table 1: Summary Statistics

|  | (1) | (2) | (3) | (4) |
| --- | --- | --- | --- | --- |
|  | 1980 | 1990 | 2000 | 2010 |
| Natives |  |  |  |  |
|  |  |  |  |  |
| Age | 40.60 | 40.28 | 42.13 | 44.00 |
|  | (11.10) | (10.28) | (9.95) | (10.76) |
|  |  |  |  |  |
| Years Educ. | 12.48 | 13.18 | 13.52 | 13.94 |
|  | (2.79) | (2.39) | (2.36) | (2.40) |
|  |  |  |  |  |
| Some College+ | 0.37 | 0.53 | 0.63 | 0.70 |
|  | (0.48) | (0.50) | (0.48) | (0.46) |
|  |  |  |  |  |
| Weekly Income | 593.05 | 681.51 | 811.86 | 820.43 |
|  | (523.75) | (693.86) | (1,030.50) | (859.70) |
|  |  |  |  |  |
| 11-15 YSM |  |  |  |  |
|  |  |  |  |  |
| Age | 26.56 | 26.55 | 26.71 | 26.61 |
|  | (1.12) | (1.10) | (1.08) | (1.15) |
|  |  |  |  |  |
| Age at Migration | 15.56 | 15.55 | 15.71 | 15.61 |
|  | (1.12) | (1.10) | (1.08) | (1.15) |
|  |  |  |  |  |
| Years Educ. | 11.45 | 11.69 | 11.83 | 12.40 |
|  | (3.90) | (3.95) | (3.70) | (3.40) |
|  |  |  |  |  |
| Some College+ | 0.37 | 0.46 | 0.43 | 0.49 |
|  | (0.48) | (0.50) | (0.50) | (0.50) |
|  |  |  |  |  |
| Weekly Income | 574.99 | 615.31 | 660.47 | 561.36 |
|  | (412.95) | (568.14) | (1,499.67) | (525.97) |
|  |  |  |  |  |
| 21-25 YSM |  |  |  |  |
|  |  |  |  |  |
| Age |  | 31.24 | 32.01 | 32.19 |
|  |  | (4.18) | (4.10) | (4.16) |
|  |  |  |  |  |
| Age at Migration |  | 10.24 | 11.01 | 11.19 |
|  |  | (4.18) | (4.10) | (4.16) |
|  |  |  |  |  |
| Years Educ. |  | 12.77 | 12.83 | 13.20 |
|  |  | (3.17) | (3.60) | (3.24) |
|  |  |  |  |  |
| Some College+ |  | 0.56 | 0.59 | 0.60 |
|  |  | (0.50) | (0.49) | (0.49) |
|  |  |  |  |  |
| Weekly Income |  | 739.97 | 844.37 | 756.44 |
|  |  | (694.67) | (1,138.20) | (778.93) |
| Observations | 1,481,366 | 1,973,997 | 2,283,265 | 1,431,303 |

Notes: Income measured in 2010 dollars. Sources: 1980, 1990, and 2000 Census and 2009-2011 ACS.

Table 2: Log Weekly Earnings Gap, by Cohort and Years Since Migration

|  | Years Since Migration | | | |
| --- | --- | --- | --- | --- |
|  | (1) | (2) | (3) | (4) |
|  | 11-15 | 21-25 | 31-35 | 41-45 |
| 1965-1969 | 0.022 | 0.160 | 0.100 | 0.083 |
|  | (0.017) | (0.010) | (0.009) | (0.013) |
|  |  |  |  |  |
| 1975-1979 | 0.043 | 0.096 | 0.109 |  |
|  | (0.013) | (0.008) | (0.011) |  |
|  |  |  |  |  |
| 1985-1989 | -0.097 | 0.010 |  |  |
|  | (0.011) | (0.009) |  |  |
|  |  |  |  |  |
| 1995-1999 | -0.134 |  |  |  |
|  | (0.015) |  |  |  |

Notes: Table shows the age-adjusted log weekly earnings gap of childhood immigrants relative to natives, separately by cohort and years since migration. Standard error of the mean shown in parentheses. Sources: 1980, 1990, and 2000 Census and 2009-2011 ACS.

Table 3: Log Weekly Earnings Gap, by Age at Migration-Cohort and Years Since Migration

|  | Years Since Migration | | | |
| --- | --- | --- | --- | --- |
|  | (1) | (2) | (3) | (4) |
|  | 11-15 | 21-25 | 31-35 | 41-45 |
| Age at Migration: 0-3 | |  |  |  |
| 1965-1969 |  |  | 0.159 | 0.120 |
|  |  |  | (0.023) | (0.031) |
|  |  |  |  |  |
| 1975-1979 |  |  | 0.211 |  |
|  |  |  | (0.025) |  |
|  |  |  |  |  |
| Age at Migration: 4-13 | | | | |
| 1965-1969 |  | 0.193 | 0.141 | 0.110 |
|  |  | (0.011) | (0.012) | (0.017) |
|  |  |  |  |  |
| 1975-1979 |  | 0.158 | 0.152 |  |
|  |  | (0.009) | (0.014) |  |
|  |  |  |  |  |
| 1985-1989 |  | 0.078 |  |  |
|  |  | (0.011) |  |  |
|  |  |  |  |  |
| Age at Migration: 14-17 | | | | |
| 1965-1969 | 0.022 | 0.075 | -0.048 | -0.017 |
|  | (0.017) | (0.019) | (0.018) | (0.027) |
|  |  |  |  |  |
| 1975-1979 | 0.043 | -0.021 | -0.035 |  |
|  | (0.013) | (0.014) | (0.021) |  |
|  |  |  |  |  |
| 1985-1989 | -0.097 | -0.108 |  |  |
|  | (0.011) | (0.016) |  |  |
|  |  |  |  |  |
| 1995-1999 | -0.134 |  |  |  |
|  | (0.015) |  |  |  |

Notes: Table shows the age-adjusted log weekly earnings gap of childhood immigrants relative to natives, separately by age at migration-cohort and years since migration. Standard error of the mean shown in parentheses. Sources: 1980, 1990, and 2000 Census and 2009-2011 ACS.

Table 4: OLS Regressions, Log Weekly Earnings

|  | (1) | (2) | (3) | (4) | (5) | (6) |
| --- | --- | --- | --- | --- | --- | --- |
| Cohort: |  |  |  |  |  |  |
|  |  |  |  |  |  |  |
| 1960-1964 | 0.017*** | 0.024*** | 0.000 | 0.001 | -0.006* | 0.010** |
|  | (0.001) | (0.004) | (0.002) | (0.002) | (0.002) | (0.003) |
|  |  |  |  |  |  |  |
| 1970-1974 | -0.019*** | 0.002 | -0.013*** | -0.007** | -0.008*** | -0.009* |
|  | (0.002) | (0.005) | (0.002) | (0.002) | (0.002) | (0.003) |
|  |  |  |  |  |  |  |
| 1975-1979 | -0.013** | -0.011 | -0.018*** | 0.010** | -0.010* | -0.024* |
|  | (0.003) | (0.009) | (0.003) | (0.002) | (0.003) | (0.008) |
|  |  |  |  |  |  |  |
| 1980-1984 | -0.051*** | -0.053*** | -0.038*** | -0.027*** | -0.029*** | -0.047*** |
|  | (0.005) | (0.009) | (0.005) | (0.004) | (0.004) | (0.008) |
|  |  |  |  |  |  |  |
| 1985-1989 | -0.121*** | -0.084*** | -0.079*** | -0.090*** | -0.068*** | -0.071*** |
|  | (0.007) | (0.010) | (0.007) | (0.007) | (0.007) | (0.009) |
|  |  |  |  |  |  |  |
| 1990-1994 | -0.166*** | -0.137*** | -0.117*** | -0.137*** | -0.106*** | -0.113*** |
|  | (0.010) | (0.010) | (0.010) | (0.008) | (0.009) | (0.010) |
|  |  |  |  |  |  |  |
| 1995-1999 | -0.184*** | -0.164*** | -0.130*** | -0.161*** | -0.122*** | -0.125*** |
|  | (0.017) | (0.014) | (0.015) | (0.014) | (0.014) | (0.012) |
|  |  |  |  |  |  |  |
| Age at Migration: |  |  |  |  |  |  |
|  |  |  |  |  |  |  |
| 4-8 | 0.008 | -0.007 | 0.014 | 0.015 | 0.016 | 0.006 |
|  | (0.014) | (0.014) | (0.011) | (0.014) | (0.012) | (0.013) |
|  |  |  |  |  |  |  |
| 9-13 | -0.050* | -0.069** | -0.005 | -0.008 | 0.010 | -0.010 |
|  | (0.020) | (0.018) | (0.014) | (0.015) | (0.012) | (0.014) |
|  |  |  |  |  |  |  |
| 14-15 | -0.150*** | -0.149*** | -0.046* | -0.048* | -0.007 | -0.028 |
|  | (0.027) | (0.022) | (0.018) | (0.019) | (0.015) | (0.016) |
|  |  |  |  |  |  |  |
| 16-17 | -0.208*** | -0.190*** | -0.068** | -0.064** | -0.011 | -0.031 |
|  | (0.027) | (0.022) | (0.018) | (0.017) | (0.013) | (0.016) |
|  |  |  |  |  |  |  |
| Birthplace | No | Yes | No | No | No | Yes |
|  |  |  |  |  |  |  |
| Education | No | No | Yes | No | Yes | Yes |
|  |  |  |  |  |  |  |
| English | No | No | No | Yes | Yes | Yes |
| Observations | 7,254,358 | 7,254,358 | 7,254,358 | 7,254,358 | 7,254,358 | 7,254,358 |
| R­2 | 0.022 | 0.023 | 0.126 | 0.023 | 0.126 | 0.126 |

Notes: Dependent variable is log weekly earnings in 2010 dollars. Omitted categories are 1965-69 cohort and 0-3 age at migration. Birthplace measured using detailed Census code, and both education and English proficiency using dummy variables with five groups each. All specifications include survey year, an immigrant dummy variable, age (introduced as a third-order polynomial) and fully interacted with survey year, years since migration, years since migration squared, and a constant. Sources: 1980, 1990, and 2000 Census and 2009-2011 ACS. Standard errors in parentheses, and are clustered at the immigrant cohort level.

* *p* < 0.05, ** *p* < 0.01, *** *p* < 0.001

Table 5: Linear Probability Models, Educational Attainment and English Proficiency

|  | Some College+ | | English Very Well+ | |
| --- | --- | --- | --- | --- |
|  | (1) | (2) | (3) | (4) |
| Cohort: |  |  |  |  |
|  |  |  |  |  |
| 1960-1964 | 0.034*** | 0.027*** | 0.031*** | 0.020*** |
|  | (0.001) | (0.003) | (0.001) | (0.002) |
|  |  |  |  |  |
| 1970-1974 | -0.020*** | 0.003 | -0.021*** | 0.014** |
|  | (0.001) | (0.004) | (0.001) | (0.004) |
|  |  |  |  |  |
| 1975-1979 | -0.021*** | -0.010* | -0.040*** | 0.017** |
|  | (0.001) | (0.004) | (0.001) | (0.004) |
|  |  |  |  |  |
| 1980-1984 | -0.049*** | -0.041*** | -0.039*** | 0.017* |
|  | (0.002) | (0.005) | (0.002) | (0.006) |
|  |  |  |  |  |
| 1985-1989 | -0.099*** | -0.060*** | -0.051*** | 0.019** |
|  | (0.003) | (0.006) | (0.003) | (0.005) |
|  |  |  |  |  |
| 1990-1994 | -0.115*** | -0.081*** | -0.045*** | 0.026** |
|  | (0.005) | (0.007) | (0.004) | (0.006) |
|  |  |  |  |  |
| 1995-1999 | -0.130*** | -0.106*** | -0.025* | 0.034** |
|  | (0.010) | (0.009) | (0.010) | (0.009) |
|  |  |  |  |  |
| Age at Migration: |  |  |  |  |
|  |  |  |  |  |
| 4-8 | -0.007 | -0.016 | -0.012 | -0.021* |
|  | (0.008) | (0.007) | (0.006) | (0.009) |
|  |  |  |  |  |
| 9-13 | -0.056** | -0.064*** | -0.092*** | -0.102*** |
|  | (0.012) | (0.009) | (0.011) | (0.015) |
|  |  |  |  |  |
| 14-15 | -0.139*** | -0.130*** | -0.222*** | -0.223*** |
|  | (0.014) | (0.010) | (0.019) | (0.022) |
|  |  |  |  |  |
| 16-17 | -0.196*** | -0.173*** | -0.306*** | -0.298*** |
|  | (0.012) | (0.009) | (0.021) | (0.022) |
|  |  |  |  |  |
| Birthplace | No | Yes | No | Yes |
| Mean | 0.555 | 0.555 | 0.765 | 0.765 |
| Observations | 7,254,358 | 7,254,358 | 121,644 | 121,644 |
| R2 | 0.079 | 0.082 | 0.094 | 0.213 |

Notes: Dependent variable for all columns is binary, and equals one if the worker has at least some college education and zero otherwise (columns 1-2), and equals one if the worker reports speaking English very well or only English and zero otherwise (columns 3-4). Omitted categories are 1965-69 cohort and 0-3 age at migration. Birthplace measured using detailed Census code. All specifications include years since migration, years since migration squared, and a constant; columns (1-2) include survey year, age (introduced as a third-order polynomial) and fully interacted with survey year, and an immigrant dummy variable. Row 'Mean' shows the mean of the dependent variable. Sources: 1980, 1990, and 2000 Census and 2009-2011 ACS. Standard errors in parentheses, and are clustered at the immigrant cohort level.

* *p* < 0.05, ** *p* < 0.01, *** *p* < 0.001

Table 6: Parental Skill Levels of Childhood Immigrants, by Cohort and Birthplace

| **Panel A: Log Weekly Earnings** | | | | | |
| --- | --- | --- | --- | --- | --- |
|  | (1) | (2) | (3) | (4) | (5) |
|  | All | Canada | Mexico | Non-Mex LA | Non-LA |
| 1965-1969 | -0.289 | 0.168 | -0.528 | -0.320 | -0.130 |
|  |  |  |  |  |  |
| 1975-1979 | -0.415 | 0.237 | -0.616 | -0.463 | -0.227 |
|  |  |  |  |  |  |
| 1985-1989 | -0.501 | 0.329 | -0.707 | -0.512 | -0.258 |
|  |  |  |  |  |  |
| 1995-1999 | -0.407 | 0.434 | -0.625 | -0.476 | -0.150 |
| **Panel B: Some College+**   |  | (1) | (2) | (3) | (4) | (5) | | --- | --- | --- | --- | --- | --- | |  | All | Canada | Mexico | Non-Mex LA | Non-LA | | 1965-1969 | -0.022 | 0.088 | -0.251 | -0.014 | 0.102 | |  |  |  |  |  |  | | 1975-1979 | -0.111 | 0.183 | -0.390 | -0.146 | 0.134 | |  |  |  |  |  |  | | 1985-1989 | -0.208 | 0.200 | -0.409 | -0.256 | 0.061 | |  |  |  |  |  |  | | 1995-1999 | -0.181 | 0.261 | -0.427 | -0.242 | 0.098 | | | | | | |

Notes: Table shows the age-adjusted skill levels of the (potential) parents of childhood immigrants relative to natives, separately by cohort and a selection of birthplaces. Panel A shows skills measured based on earnings, while panel B shows skills measured based on having at least some college education, both measured shortly after arrival. Sources: 1980, 1990, and 2000 Census and 2009-2011 ACS.

Table 7: OLS Regressions, Log Weekly Earnings, Educational Attainment, and English Language Proficiency

|  | Log Earnings | | Some College+ | | English Very Well+ | |
| --- | --- | --- | --- | --- | --- | --- |
|  | (1) | (2) | (3) | (4) | (5) | (6) |
| Cohort: |  |  |  |  |  |  |
|  |  |  |  |  |  |  |
| 1960-1964 | 0.017*** | 0.011** | 0.034*** | 0.024*** | 0.031*** | 0.014*** |
|  | (0.001) | (0.002) | (0.001) | (0.002) | (0.001) | (0.001) |
|  |  |  |  |  |  |  |
| 1970-1974 | -0.019*** | 0.069*** | -0.020*** | 0.063*** | -0.021*** | 0.037*** |
|  | (0.002) | (0.009) | (0.001) | (0.005) | (0.001) | (0.003) |
|  |  |  |  |  |  |  |
| 1975-1979 | -0.013** | 0.055*** | -0.021*** | 0.047*** | -0.040*** | 0.018*** |
|  | (0.003) | (0.009) | (0.001) | (0.006) | (0.001) | (0.003) |
|  |  |  |  |  |  |  |
| 1980-1984 | -0.051*** | 0.078*** | -0.049*** | 0.073*** | -0.039*** | 0.049*** |
|  | (0.005) | (0.014) | (0.002) | (0.009) | (0.002) | (0.005) |
|  |  |  |  |  |  |  |
| 1985-1989 | -0.121*** | 0.024 | -0.099*** | 0.039** | -0.051*** | 0.048*** |
|  | (0.007) | (0.018) | (0.003) | (0.010) | (0.003) | (0.007) |
|  |  |  |  |  |  |  |
| 1990-1994 | -0.166*** | -0.017 | -0.115*** | 0.020 | -0.045*** | 0.033** |
|  | (0.010) | (0.019) | (0.005) | (0.009) | (0.004) | (0.007) |
|  |  |  |  |  |  |  |
| 1995-1999 | -0.184*** | -0.050 | -0.130*** | -0.009 | -0.025* | 0.042** |
|  | (0.017) | (0.024) | (0.010) | (0.012) | (0.010) | (0.011) |
|  |  |  |  |  |  |  |
| Parent Log Earnings |  | -0.118* |  | -0.005 |  | 0.285*** |
|  | (0.044) |  | (0.038) |  | (0.016) |
|  |  |  |  |  |  |  |
| Parent Some College+ |  | 0.948*** |  | 0.770*** |  | 0.197*** |
|  | (0.077) |  | (0.035) |  | (0.016) |
| Mean |  |  | 0.555 | 0.555 | 0.765 | 0.765 |
| Observations | 7,254,358 | 7,254,358 | 7,254,358 | 7,254,358 | 121,644 | 121,644 |
| R2 | 0.022 | 0.023 | 0.079 | 0.081 | 0.094 | 0.162 |

Notes: Dependent variable is log weekly earnings in 2010 dollars in columns (1-3); in columns (4-9) it is binary, and equals one if the worker has at least some college education and zero otherwise (columns 4-6), and equals one if the worker reports speaking English very well or only English and zero otherwise (columns 7-9). Omitted category is the 1965-69 cohort. All specifications include years since migration, years since migration squared, and a constant; columns (1-6) include survey year, age (introduced as a third-order polynomial) and fully interacted with survey year, and an immigrant dummy variable. Row 'Mean' shows the mean of the dependent variable. Sources: 1980, 1990, and 2000 Census and 2009-2011 ACS. Standard errors in parentheses, and are clustered at the immigrant cohort level.

* *p* < 0.05, ** *p* < 0.01, *** *p* < 0.001

Table 8: OLS Regressions, Log Weekly Earnings, Educational Attainment, and English Language Proficiency, by Age at Migration

| **Panel A: Log Weekly Earnings** | | | | |  |
| --- | --- | --- | --- | --- | --- |
|  | (1) | (2) | (3) | (4) | (5) |
|  | 0-3 | 4-8 | 9-13 | 14-15 | 16-17 |
| Parent Log Earnings | -0.156 | -0.194** | -0.130 | -0.082 | 0.003 |
|  | (0.098) | (0.072) | (0.071) | (0.072) | (0.077) |
|  |  |  |  |  |  |
| Parent Some College+ | 0.808*** | 0.868*** | 0.939*** | 0.998*** | 1.042*** |
|  | (0.102) | (0.090) | (0.085) | (0.088) | (0.089) |
| Observations | 7,142,095 | 7,160,446 | 7,169,675 | 7,154,731 | 7,158,267 |
| R2 | 0.022 | 0.022 | 0.022 | 0.022 | 0.022 |
| **Panel B: Some College+** | | | | | |
|  | (1) | (2) | (3) | (4) | (5) |
|  | 0-3 | 4-8 | 9-13 | 14-15 | 16-17 |
| Parent Log Earnings | 0.055 | -0.030 | -0.028 | -0.002 | 0.013 |
|  | (0.042) | (0.041) | (0.045) | (0.046) | (0.048) |
|  |  |  |  |  |  |
| Parent Some College+ | 0.501*** | 0.622*** | 0.751*** | 0.928*** | 0.965*** |
|  | (0.051) | (0.057) | (0.059) | (0.060) | (0.058) |
| Observations | 7,142,095 | 7,160,446 | 7,169,675 | 7,154,731 | 7,158,267 |
| R2 | 0.079 | 0.080 | 0.080 | 0.080 | 0.080 |
| **Panel C: English Very Well+** | | | | | |
|  | (1) | (2) | (3) | (4) | (5) |
|  | 0-3 | 4-8 | 9-13 | 14-15 | 16-17 |
| Parent Log Earnings | 0.126*** | 0.136*** | 0.282*** | 0.432*** | 0.471*** |
|  | (0.015) | (0.018) | (0.033) | (0.047) | (0.047) |
|  |  |  |  |  |  |
| Parent Some College+ | 0.033 | 0.080*** | 0.134*** | 0.261*** | 0.380*** |
|  | (0.018) | (0.017) | (0.040) | (0.062) | (0.059) |
| Observations | 9,381 | 27,732 | 36,961 | 22,017 | 25,553 |
| R2 | 0.026 | 0.031 | 0.064 | 0.118 | 0.164 |

Notes: Dependent variable is log weekly earnings in 2010 dollars in panel A; in panels B and C it is binary, and equals one if the worker has at least some college education and zero otherwise (panel B), and equals one if the worker reports speaking English very well or only English and zero otherwise (panel C). Each column includes immigrants with age at migration equal to the value listed, and panels A and B also include natives. All specifications include years since migration, years since migration squared, year of immigrant cohort dummy variables, and a constant; panels A and B include survey year, age (introduced as a third-order polynomial) and fully interacted with survey year, and an immigrant dummy variable. Sources: 1980, 1990, and 2000 Census and 2009-2011 ACS. Standard errors in parentheses, and are clustered at the birthplace-immigrant cohort level.

* *p* < 0.05, ** *p* < 0.01, *** *p* < 0.001

# Appendix Tables

Table A1: OLS Regressions, Log Weekly Earnings, by Maximum Age at Migration

|  | (1) | (2) | (3) | (4) |
| --- | --- | --- | --- | --- |
|  | 0-3 | 4-8 | 9-13 | 14-15 |
| Cohort: |  |  |  |  |
|  |  |  |  |  |
| 1960-1964 | -0.005 | -0.008* | 0.004 | 0.016*** |
|  | (0.003) | (0.003) | (0.003) | (0.001) |
|  |  |  |  |  |
| 1970-1974 | 0.019** | -0.019* | -0.014*** | -0.011** |
|  | (0.003) | (0.007) | (0.003) | (0.002) |
|  |  |  |  |  |
| 1975-1979 | 0.060*** | 0.009 | -0.002 | -0.005 |
|  | (0.003) | (0.005) | (0.003) | (0.003) |
|  |  |  |  |  |
| 1980-1984 | -0.049** | -0.032** | -0.042** | -0.034*** |
|  | (0.009) | (0.006) | (0.008) | (0.006) |
|  |  |  |  |  |
| 1985-1989 |  | -0.136** | -0.095*** | -0.102*** |
|  |  | (0.027) | (0.009) | (0.009) |
|  |  |  |  |  |
| 1990-1994 |  |  | -0.178*** | -0.152*** |
|  |  |  | (0.020) | (0.013) |
|  |  |  |  |  |
| 1995-1999 |  |  |  | -0.141*** |
|  |  |  |  | (0.023) |
|  |  |  |  |  |
| Age at Migration: |  |  |  |  |
|  |  |  |  |  |
| 4-8 |  | 0.013 | 0.006 | 0.009 |
|  |  | (0.013) | (0.015) | (0.014) |
|  |  |  |  |  |
| 9-13 |  |  | -0.046* | -0.046* |
|  |  |  | (0.019) | (0.019) |
|  |  |  |  |  |
| 14-15 |  |  |  | -0.142*** |
|  |  |  |  | (0.025) |
| Observations | 7,142,095 | 7,169,827 | 7,206,788 | 7,228,805 |
| R2 | 0.022 | 0.022 | 0.022 | 0.022 |

Notes: Dependent variable is log weekly earnings in 2010 dollars. Each column includes natives and immigrants with age at migration up to and including the value listed. Omitted category are 1965-69 cohort and 0-3 age at migration. All specifications include survey year, an immigrant dummy variable, age (introduced as a third-order polynomial) and fully interacted with survey year, years since migration, years since migration squared, and a constant. Sources: 1980, 1990, and 2000 Census and 2009-2011 ACS. Standard errors in parentheses, and are clustered at the immigrant cohort level.

* *p* < 0.05, ** *p* < 0.01, *** *p* < 0.001

Table A2: OLS Regressions, Log Weekly Earnings, by Age at Migration

|  | (1) | (2) | (3) | (4) | (5) |
| --- | --- | --- | --- | --- | --- |
|  | 0-3 | 4-8 | 9-13 | 14-15 | 16-17 |
| Cohort: |  |  |  |  |  |
|  |  |  |  |  |  |
| 1960-1964 | -0.005 | -0.007 | 0.019* | 0.081*** | 0.053*** |
|  | (0.003) | (0.006) | (0.007) | (0.006) | (0.005) |
|  |  |  |  |  |  |
| 1970-1974 | 0.019** | -0.035* | -0.011 | 0.009 | -0.055*** |
|  | (0.003) | (0.010) | (0.007) | (0.005) | (0.004) |
|  |  |  |  |  |  |
| 1975-1979 | 0.060*** | -0.005 | -0.012 | -0.005 | -0.046*** |
|  | (0.003) | (0.006) | (0.006) | (0.005) | (0.004) |
|  |  |  |  |  |  |
| 1980-1984 | -0.049** | -0.024** | -0.048* | 0.003 | -0.107*** |
|  | (0.009) | (0.006) | (0.015) | (0.007) | (0.006) |
|  |  |  |  |  |  |
| 1985-1989 |  | -0.143** | -0.046* | -0.107*** | -0.177*** |
|  |  | (0.025) | (0.014) | (0.012) | (0.008) |
|  |  |  |  |  |  |
| 1990-1994 |  |  | -0.182*** | -0.093*** | -0.195*** |
|  |  |  | (0.027) | (0.013) | (0.008) |
|  |  |  |  |  |  |
| 1995-1999 |  |  |  | -0.136*** | -0.260*** |
|  |  |  |  | (0.023) | (0.014) |
| Observations | 7,142,095 | 7,160,446 | 7,169,675 | 7,154,731 | 7,158,267 |
| R2 | 0.022 | 0.022 | 0.022 | 0.022 | 0.021 |

Notes: Dependent variable is log weekly earnings in 2010 dollars. Each column includes natives and immigrants with age at migration equal to the value listed. Omitted category is 1965-69 cohort. All specifications include survey year, an immigrant dummy variable, age (introduced as a third-order polynomial) and fully interacted with survey year, years since migration, years since migration squared, and a constant. Sources: 1980, 1990, and 2000 Census and 2009-2011 ACS. Standard errors in parentheses, and are clustered at the immigrant cohort level.

* *p* < 0.05, ** *p* < 0.01, *** *p* < 0.001

# Online Appendix Tables

Table WA1: Descriptive Statistics, Alternate Cohorts

|  | (1) | (2) | (3) | (4) |
| --- | --- | --- | --- | --- |
|  | 1980 | 1990 | 2000 | 2010 |
| Natives |  |  |  |  |
|  |  |  |  |  |
| Age | 40.60 | 40.28 | 42.13 | 44.00 |
|  | (11.10) | (10.28) | (9.95) | (10.76) |
|  |  |  |  |  |
| Years Educ. | 12.48 | 13.18 | 13.52 | 13.94 |
|  | (2.79) | (2.39) | (2.36) | (2.40) |
|  |  |  |  |  |
| Some College+ | 0.37 | 0.53 | 0.63 | 0.70 |
|  | (0.48) | (0.50) | (0.48) | (0.46) |
|  |  |  |  |  |
| Weekly Income | 593.05 | 681.51 | 811.86 | 820.43 |
|  | (523.75) | (693.86) | (1,030.50) | (859.70) |
|  |  |  |  |  |
| 16-20 YSM |  |  |  |  |
|  |  |  |  |  |
| Age | 28.98 | 29.27 | 29.47 | 29.51 |
|  | (2.61) | (2.61) | (2.59) | (2.56) |
|  |  |  |  |  |
| Age at Migration | 12.98 | 13.27 | 13.47 | 13.51 |
|  | (2.61) | (2.61) | (2.59) | (2.56) |
|  |  |  |  |  |
| Years Educ. | 12.47 | 12.22 | 12.54 | 12.91 |
|  | (3.33) | (3.66) | (3.56) | (3.27) |
|  |  |  |  |  |
| Some College+ | 0.46 | 0.51 | 0.54 | 0.55 |
|  | (0.50) | (0.50) | (0.50) | (0.50) |
|  |  |  |  |  |
| Weekly Income | 639.52 | 706.08 | 762.56 | 648.18 |
|  | (567.52) | (693.67) | (910.97) | (567.32) |
|  |  |  |  |  |
| 26-30 YSM |  |  |  |  |
|  |  |  |  |  |
| Age |  | 34.42 | 35.58 | 35.85 |
|  |  | (5.03) | (4.84) | (4.90) |
|  |  |  |  |  |
| Age at Migration |  | 8.42 | 9.58 | 9.85 |
|  |  | (5.03) | (4.84) | (4.90) |
|  |  |  |  |  |
| Years Educ. |  | 13.20 | 12.90 | 13.43 |
|  |  | (2.94) | (3.41) | (3.27) |
|  |  |  |  |  |
| Some College+ |  | 0.60 | 0.59 | 0.64 |
|  |  | (0.49) | (0.49) | (0.48) |
|  |  |  |  |  |
| Weekly Income |  | 791.33 | 874.55 | 862.22 |
|  |  | (911.85) | (1,036.62) | (1,039.42) |
| Observations | 1,482,297 | 1,975,991 | 2,286,855 | 1,434,888 |

Notes: Income measured in 2010 dollars. Sources: 1980, 1990, and 2000 Census and 2009-2011 ACS.

Table WA2: Log Weekly Earnings Gap, by Cohort and Years Since Migration, Alternate Cohorts

|  | (1) | (2) | (3) | (4) |
| --- | --- | --- | --- | --- |
|  | 16-20 | 26-30 | 36-40 | 46-50 |
| 1960-1964 | 0.105 | 0.173 | 0.089 | 0.102 |
|  | (0.015) | (0.010) | (0.011) | (0.015) |
|  |  |  |  |  |
| 1970-1974 | 0.137 | 0.099 | 0.048 |  |
|  | (0.011) | (0.008) | (0.011) |  |
|  |  |  |  |  |
| 1980-1984 | 0.042 | 0.072 |  |  |
|  | (0.008) | (0.009) |  |  |
|  |  |  |  |  |
| 1990-1994 | -0.068 |  |  |  |
|  | (0.011) |  |  |  |

Notes: Table shows the age-adjusted log weekly earnings gap of childhood immigrants relative to natives, separately by cohort and years since migration. Standard error of the mean shown in parentheses. Sources: 1980, 1990, and 2000 Census and 2009-2011 ACS.

Table WA3: Log Weekly Earnings Gap, by Age at Migration(0-13)-Cohort and Years Since Migration, Alternate Cohorts

|  | Years Since Migration | | |  |
| --- | --- | --- | --- | --- |
|  | (1) | (2) | (3) | (4) |
|  | 16-20 | 26-30 | 36-40 | 46-50 |
| Age at Migration: 0-3 | |  |  |  |
|  |  |  |  |  |
| 1960-1964 |  | 0.150 | 0.143 | 0.118 |
|  |  | (0.023) | (0.028) | (0.033) |
|  |  |  |  |  |
| 1970-1974 |  | 0.188 | 0.153 |  |
|  |  | (0.020) | (0.030) |  |
|  |  |  |  |  |
| 1980-1984 |  | 0.115 |  |  |
|  |  | (0.028) |  |  |
|  |  |  |  |  |
| Age at Migration: 4-8 | |  |  |  |
| 1960-1964 |  | 0.225 | 0.118 | 0.102 |
|  |  | (0.017) | (0.018) | (0.026) |
|  |  |  |  |  |
| 1970-1974 |  | 0.210 | 0.099 |  |
|  |  | (0.014) | (0.022) |  |
|  |  |  |  |  |
| 1980-1984 |  | 0.182 |  |  |
|  |  | (0.016) |  |  |
|  |  |  |  |  |
| Age at Migration: 9-13 | |  |  |  |
| 1960-1964 | 0.115 | 0.201 | 0.091 |  |
|  | (0.019) | (0.020) | (0.020) |  |
|  |  |  |  |  |
| 1970-1974 | 0.176 | 0.104 | 0.070 |  |
|  | (0.014) | (0.015) | (0.021) |  |
|  |  |  |  |  |
| 1980-1984 | 0.084 | 0.103 |  |  |
|  | (0.011) | (0.018) |  |  |
|  |  |  |  |  |
| 1990-1994 | -0.026 |  |  |  |
|  | (0.015) |  |  |  |

Notes: Table shows the age-adjusted log weekly earnings gap of childhood immigrants relative to natives, separately by age at migration-cohort and years since migration. Standard error of the mean shown in parentheses. Sources: 1980, 1990, and 2000 Census and 2009-2011 ACS.

Table WA4: Log Weekly Earnings Gap, by Age at Migration(14-17)-Cohort and Years Since Migration, Alternate Cohorts

|  | Years Since Migration | | | |
| --- | --- | --- | --- | --- |
|  | (1) | (2) | (3) | (4) |
|  | 16-20 | 26-30 | 36-40 | 46-50 |
| Age at Migration: 14-15 | | | | |
| 1960-1964 | 0.118 | 0.080 | 0.056 | 0.058 |
|  | (0.031) | (0.034) | (0.035) | (0.048) |
|  |  |  |  |  |
| 1970-1974 | 0.129 | -0.027 | -0.057 |  |
|  | (0.022) | (0.022) | (0.031) |  |
|  |  |  |  |  |
| 1980-1984 | 0.064 | -0.020 |  |  |
|  | (0.017) | (0.026) |  |  |
|  |  |  |  |  |
| 1990-1994 | -0.062 |  |  |  |
|  | (0.021) |  |  |  |
|  |  |  |  |  |
| Age at Migration: 16-17 | | | | |
| 1960-1964 | 0.067 | 0.084 | -0.046 | 0.016 |
|  | (0.031) | (0.029) | (0.032) | (0.048) |
|  |  |  |  |  |
| 1970-1974 | 0.069 | -0.107 | -0.144 |  |
|  | (0.023) | (0.021) | (0.029) |  |
|  |  |  |  |  |
| 1980-1984 | -0.043 | -0.126 |  |  |
|  | (0.016) | (0.023) |  |  |
|  |  |  |  |  |
| 1990-1994 | -0.141 |  |  |  |
|  | (0.021) |  |  |  |

Notes: Table shows the age-adjusted log weekly earnings gap of childhood immigrants relative to natives, separately by age at migration-cohort and years since migration. Standard error of the mean shown in parentheses. Sources: 1980, 1990, and 2000 Census and 2009-2011 ACS.

Table WA5: Some College+ Gap, by Cohort and Years Since Migration

|  | Years Since Migration | | | |
| --- | --- | --- | --- | --- |
|  | (1) | (2) | (3) | (4) |
|  | 11-15 | 21-25 | 31-35 | 41-45 |
| 1965-1969 | -0.127 | -0.027 | -0.029 | -0.032 |
|  | (0.011) | (0.006) | (0.005) | (0.007) |
|  |  |  |  |  |
| 1975-1979 | -0.107 | -0.065 | -0.057 |  |
|  | (0.009) | (0.005) | (0.005) |  |
|  |  |  |  |  |
| 1985-1989 | -0.241 | -0.132 |  |  |
|  | (0.007) | (0.006) |  |  |
|  |  |  |  |  |
| 1995-1999 | -0.245 |  |  |  |
|  | (0.010) |  |  |  |

Notes: Table shows the age-adjusted fraction childhood immigrants who have at least some college education relative to natives, separately by cohort and years since migration. Standard error of the mean shown in parentheses. Sources: 1980, 1990, and 2000 Census and 2009-2011 ACS.

Table WA6: Some College+ Gap, by Age at Migration(0-13)-Cohort and Years Since Migration

|  | Years Since Migration | | | | | |  |
| --- | --- | --- | --- | --- | --- | --- | --- |
|  | (1) | | (2) | | (3) | | (4) |
|  | 11-15 | | 21-25 | | 31-35 | | 41-45 |
| Age at Migration: 0-3 | | | | | | |  |
| 1965-1969 |  | |  | | 0.073 | | 0.018 |
|  |  | |  | | (0.013) | | (0.016) |
|  |  | |  | |  | |  |
| 1975-1979 |  | |  | | 0.002 | |  |
|  |  | |  | | (0.013) | |  |
|  |  | |  | |  | |  |
| Age at Migration: 4-8 | | | | | | |  |
| 1965-1969 |  | | 0.066 | | 0.032 | | 0.017 |
|  |  | | (0.010) | | (0.009) | | (0.011) |
|  |  | |  | |  | |  |
| 1975-1979 |  | | 0.005 | | -0.006 | |  |
|  |  | | (0.008) | | (0.009) | |  |
|  |  | |  | |  | |  |
| 1985-1989 |  | | -0.060 | |  | |  |
|  |  | | (0.010) | |  | |  |
|  | |  | |  | |  |  |
| Age at Migration: 9-13 | | | | | | |  |
| 1965-1969 |  | | -0.046 | | -0.047 | | -0.026 |
|  |  | | (0.011) | | (0.010) | | (0.013) |
|  |  | |  | |  | |  |
| 1975-1979 |  | | -0.032 | | -0.073 | |  |
|  |  | | (0.008) | | (0.010) | |  |
|  |  | |  | |  | |  |
| 1985-1989 |  | | -0.090 | |  | |  |
|  |  | | (0.010) | |  | |  |

Notes: Table shows the age-adjusted fraction childhood immigrants who have at least some college education relative to natives, separately by cohort and years since migration. Standard error of the mean shown in parentheses. Sources: 1980, 1990, and 2000 Census and 2009-2011 ACS.

Table WA7: Some College+ Gap, by Age at Migration(14-17)-Cohort and Years Since Migration

|  | Years Since Migration | | | |
| --- | --- | --- | --- | --- |
|  | (1) | (2) | (3) | (4) |
|  | 11-15 | 21-25 | 31-35 | 41-45 |
| Age at Migration: 14-15 | | | | |
| 1965-1969 | -0.103 | -0.125 | -0.143 | -0.145 |
|  | (0.017) | (0.017) | (0.016) | (0.021) |
|  |  |  |  |  |
| 1975-1979 | -0.077 | -0.130 | -0.106 |  |
|  | (0.013) | (0.012) | (0.016) |  |
|  |  |  |  |  |
| 1985-1989 | -0.209 | -0.187 |  |  |
|  | (0.011) | (0.014) |  |  |
|  |  |  |  |  |
| 1995-1999 | -0.199 |  |  |  |
|  | (0.015) |  |  |  |
|  |  |  |  |  |
| Age at Migration: 16-17 | | | | |
| 1965-1969 | -0.149 | -0.145 | -0.180 | -0.148 |
|  | (0.015) | (0.017) | (0.016) | (0.022) |
|  |  |  |  |  |
| 1975-1979 | -0.133 | -0.189 | -0.147 |  |
|  | (0.013) | (0.011) | (0.015) |  |
|  |  |  |  |  |
| 1985-1989 | -0.263 | -0.262 |  |  |
|  | (0.009) | (0.013) |  |  |
|  |  |  |  |  |
| 1995-1999 | -0.283 |  |  |  |
|  | (0.013) |  |  |  |

Notes: Table shows the age-adjusted fraction childhood immigrants who have at least some college education relative to natives, separately by cohort and years since migration. Standard error of the mean shown in parentheses. Sources: 1980, 1990, and 2000 Census and 2009-2011 ACS.

Table WA8: Speak English Very Well+, by Cohort and Years Since Migration

|  | Years Since Migration | | | |
| --- | --- | --- | --- | --- |
|  | (1) | (2) | (3) | (4) |
|  | 11-15 | 21-25 | 31-35 | 41-45 |
| 1965-1969 | 0.584 | 0.824 | 0.842 | 0.848 |
|  | (0.012) | (0.005) | (0.004) | (0.005) |
|  |  |  |  |  |
| 1975-1979 | 0.601 | 0.749 | 0.796 |  |
|  | (0.009) | (0.004) | (0.005) |  |
|  |  |  |  |  |
| 1985-1989 | 0.547 | 0.745 |  |  |
|  | (0.007) | (0.005) |  |  |
|  |  |  |  |  |
| 1995-1999 | 0.593 |  |  |  |
|  | (0.010) |  |  |  |

Notes: Table shows the fraction of childhood immigrants who report speaking English very well or only English, separately by cohort and years since migration. Standard error of the mean shown in parentheses. Sources: 1980, 1990, and 2000 Census and 2009-2011 ACS.

Table WA9: Speak English Very Well+, by Age at Migration(0-13)-Cohort and Years Since Migration

|  | Years Since Migration | | | | | |  |
| --- | --- | --- | --- | --- | --- | --- | --- |
|  | (1) | | (2) | | (3) | | (4) |
|  | 11-15 | | 21-25 | | 31-35 | | 41-45 |
| Age at Migration: 0-3 | | | | | | |  |
| 1965-1969 |  | |  | | 0.936 | | 0.934 |
|  |  | |  | | (0.007) | | (0.009) |
|  |  | |  | |  | |  |
| 1975-1979 |  | |  | | 0.913 | |  |
|  |  | |  | | (0.009) | |  |
|  |  | |  | |  | |  |
| Age at Migration: 4-8 | | | | | | |  |
| 1965-1969 |  | | 0.910 | | 0.904 | | 0.917 |
|  |  | | (0.006) | | (0.006) | | (0.007) |
|  |  | |  | |  | |  |
| 1975-1979 |  | | 0.892 | | 0.898 | |  |
|  |  | | (0.005) | | (0.006) | |  |
|  |  | |  | |  | |  |
| 1985-1989 |  | | 0.891 | |  | |  |
|  |  | | (0.007) | |  | |  |
|  | |  | |  | |  |  |
| Age at Migration: 9-13 | | | | | | |  |
| 1965-1969 |  | | 0.831 | | 0.848 | | 0.835 |
|  |  | | (0.008) | | (0.007) | | (0.010) |
|  |  | |  | |  | |  |
| 1975-1979 |  | | 0.784 | | 0.789 | |  |
|  |  | | (0.007) | | (0.009) | |  |
|  |  | |  | |  | |  |
| 1985-1989 |  | | 0.788 | |  | |  |
|  |  | | (0.008) | |  | |  |

Notes: Table shows the fraction of childhood immigrants who report speaking English very well or only English, separately by cohort and years since migration. Standard error of the mean shown in parentheses. Sources: 1980, 1990, and 2000 Census and 2009-2011 ACS.

Table WA10: Speak English Very Well+, by Age at Migration(14-17)-Cohort and Years Since Migration

|  | Years Since Migration | | | |
| --- | --- | --- | --- | --- |
|  | (1) | (2) | (3) | (4) |
|  | 11-15 | 21-25 | 31-35 | 41-45 |
| Age at Migration: 14-15 | | | | |
| 1965-1969 | 0.627 | 0.729 | 0.701 | 0.742 |
|  | (0.017) | (0.016) | (0.015) | (0.019) |
|  |  |  |  |  |
| 1975-1979 | 0.630 | 0.632 | 0.675 |  |
|  | (0.013) | (0.011) | (0.015) |  |
|  |  |  |  |  |
| 1985-1989 | 0.608 | 0.627 |  |  |
|  | (0.011) | (0.014) |  |  |
|  |  |  |  |  |
| 1995-1999 | 0.669 |  |  |  |
|  | (0.014) |  |  |  |
|  |  |  |  |  |
| Age at Migration: 16-17 | | | | |
| 1965-1969 | 0.545 | 0.666 | 0.669 | 0.662 |
|  | (0.016) | (0.016) | (0.015) | (0.021) |
|  |  |  |  |  |
| 1975-1979 | 0.575 | 0.536 | 0.597 |  |
|  | (0.013) | (0.011) | (0.014) |  |
|  |  |  |  |  |
| 1985-1989 | 0.503 | 0.554 |  |  |
|  | (0.010) | (0.013) |  |  |
|  |  |  |  |  |
| 1995-1999 | 0.530 |  |  |  |
|  | (0.013) |  |  |  |

Notes: Table shows the fraction of childhood immigrants who report speaking English very well or only English, separately by cohort and years since migration. Standard error of the mean shown in parentheses. Sources: 1980, 1990, and 2000 Census and 2009-2011 ACS.

Table WA11: OLS Regressions, Log Weekly Earnings, by Maximum Years Since Migration

|  | (1) | (2) | (3) | (4) |
| --- | --- | --- | --- | --- |
|  | 46-50 | 36-40 | 26-30 | 16-20 |
| Cohort: |  |  |  |  |
|  |  |  |  |  |
| 1960-1964 | 0.018*** | 0.018** | 0.015 | 0.043*** |
|  | (0.000) | (0.003) | (0.009) | (0.004) |
|  |  |  |  |  |
| 1970-1974 |  | -0.010* | -0.012 | 0.079*** |
|  |  | (0.003) | (0.011) | (0.004) |
|  |  |  |  |  |
| 1975-1979 |  | -0.009** | -0.034*** | 0.021*** |
|  |  | (0.001) | (0.002) | (0.000) |
|  |  |  |  |  |
| 1980-1984 |  |  | -0.058** | -0.013** |
|  |  |  | (0.011) | (0.004) |
|  |  |  |  |  |
| 1985-1989 |  |  | -0.129*** | -0.117*** |
|  |  |  | (0.002) | (0.001) |
|  |  |  |  |  |
| 1990-1994 |  |  |  | -0.123*** |
|  |  |  |  | (0.003) |
|  |  |  |  |  |
| 1995-1999 |  |  |  | -0.156*** |
|  |  |  |  | (0.000) |
|  |  |  |  |  |
| Age at Migration: |  |  |  |  |
|  |  |  |  |  |
| 0-3 | 0.027 | 0.069* | 0.019 |  |
|  | (0.014) | (0.021) | (0.032) |  |
|  |  |  |  |  |
| 4-8 | 0.051 | 0.068*** | 0.049 |  |
|  | (0.017) | (0.004) | (0.028) |  |
|  |  |  |  |  |
| 14-15 | -0.088 | -0.107** | -0.113** | -0.045** |
|  | (0.027) | (0.017) | (0.021) | (0.011) |
|  |  |  |  |  |
| 16-17 | -0.110** | -0.144** | -0.159*** | -0.094*** |
|  | (0.007) | (0.021) | (0.018) | (0.013) |
| Observations | 7,172,711 | 7,207,972 | 7,209,167 | 7,166,754 |
| R­2 | 0.022 | 0.022 | 0.022 | 0.022 |

Notes: Dependent variable is log weekly earnings in 2010 dollars. Each column includes natives and immigrants with years since migration up to and including the value listed. Omitted category are 1965-69 cohort and 9-13 age at migration. All specifications include survey year, an immigrant dummy variable, age (introduced as a third-order polynomial) and fully interacted with survey year, years since migration, years since migration squared, and a constant. Year since migration omitted from column (4), since each cohort only observed as a single years since migration value. Sources: 1980, 1990, and 2000 Census and 2009-2011 ACS. Standard errors in parentheses, and are clustered at the immigrant cohort level.

Table WA12: OLS Regressions, Log Weekly Earnings, No YSM

|  | (1) | (2) | (3) | (4) | (5) | (6) |
| --- | --- | --- | --- | --- | --- | --- |
| Cohort: |  |  |  |  |  |  |
|  |  |  |  |  |  |  |
| 1960-1964 | -0.006 | 0.006 | -0.028*** | -0.017* | -0.030*** | -0.012** |
|  | (0.003) | (0.006) | (0.003) | (0.006) | (0.004) | (0.003) |
|  |  |  |  |  |  |  |
| 1970-1974 | -0.027*** | -0.004 | -0.005 | -0.012* | 0.000 | -0.002 |
|  | (0.003) | (0.005) | (0.003) | (0.004) | (0.004) | (0.003) |
|  |  |  |  |  |  |  |
| 1975-1979 | -0.029** | -0.020 | -0.001 | 0.007 | 0.011 | -0.004 |
|  | (0.008) | (0.012) | (0.006) | (0.010) | (0.007) | (0.008) |
|  |  |  |  |  |  |  |
| 1980-1984 | -0.080*** | -0.069** | -0.020 | -0.033 | -0.004 | -0.021 |
|  | (0.012) | (0.014) | (0.009) | (0.014) | (0.011) | (0.010) |
|  |  |  |  |  |  |  |
| 1985-1989 | -0.148*** | -0.093*** | -0.051** | -0.078** | -0.027 | -0.030* |
|  | (0.016) | (0.017) | (0.012) | (0.018) | (0.014) | (0.013) |
|  |  |  |  |  |  |  |
| 1990-1994 | -0.198*** | -0.147*** | -0.088*** | -0.119*** | -0.060** | -0.067** |
|  | (0.019) | (0.020) | (0.014) | (0.021) | (0.016) | (0.015) |
|  |  |  |  |  |  |  |
| 1995-1999 | -0.182*** | -0.141*** | -0.069** | -0.096** | -0.038 | -0.044* |
|  | (0.018) | (0.019) | (0.014) | (0.024) | (0.018) | (0.016) |
|  |  |  |  |  |  |  |
| Age at Migration: |  |  |  |  |  |  |
|  |  |  |  |  |  |  |
| 4-8 | 0.031** | 0.011 | 0.023 | 0.034** | 0.024 | 0.013 |
|  | (0.008) | (0.008) | (0.011) | (0.009) | (0.011) | (0.012) |
|  |  |  |  |  |  |  |
| 9-13 | -0.005 | -0.031** | 0.012 | 0.028* | 0.024 | 0.004 |
|  | (0.008) | (0.007) | (0.011) | (0.012) | (0.012) | (0.013) |
|  |  |  |  |  |  |  |
| 14-15 | -0.094*** | -0.102*** | -0.025* | 0.001 | 0.012 | -0.010 |
|  | (0.006) | (0.008) | (0.010) | (0.011) | (0.012) | (0.012) |
|  |  |  |  |  |  |  |
| 16-17 | -0.156*** | -0.146*** | -0.055** | -0.021 | -0.001 | -0.020 |
|  | (0.014) | (0.014) | (0.016) | (0.019) | (0.018) | (0.018) |
|  |  |  |  |  |  |  |
| Birthplace | No | Yes | No | No | No | Yes |
|  |  |  |  |  |  |  |
| Education | No | No | Yes | No | Yes | Yes |
|  |  |  |  |  |  |  |
| English | No | No | No | Yes | Yes | Yes |
| Observations | 7,254,358 | 7,254,358 | 7,254,358 | 7,254,358 | 7,254,358 | 7,254,358 |
| R­2 | 0.022 | 0.023 | 0.126 | 0.023 | 0.126 | 0.126 |

Notes: Dependent variable is log weekly earnings in 2010 dollars. Omitted categories are 1965-69 cohort and 0-3 age at migration. Birthplace measured using detailed Census code, and both education and English proficiency using dummy variables with five groups each. All specifications include survey year, an immigrant dummy variable, age (introduced as a third-order polynomial) and fully interacted with survey year as well as immigrant status, and a constant. Sources: 1980, 1990, and 2000 Census and 2009-2011 ACS. Standard errors in parentheses, and are clustered at the immigrant cohort level.

Table WA13: Linear Probability Models, Educational Attainment and English Proficiency, Alternate Measures

|  | High School Grad+ | | College Grad+ | | English Well+ | |
| --- | --- | --- | --- | --- | --- | --- |
|  | (1) | (2) | (3) | (4) | (5) | (6) |
| Cohort: |  |  |  |  |  |  |
|  |  |  |  |  |  |  |
| 1960-1964 | 0.027*** | 0.018*** | 0.014*** | 0.010* | 0.015*** | 0.012*** |
|  | (0.001) | (0.002) | (0.001) | (0.004) | (0.001) | (0.001) |
|  |  |  |  |  |  |  |
| 1970-1974 | -0.024*** | 0.007* | 0.009*** | 0.021*** | -0.018*** | 0.002 |
|  | (0.001) | (0.003) | (0.001) | (0.004) | (0.001) | (0.002) |
|  |  |  |  |  |  |  |
| 1975-1979 | -0.019*** | 0.011* | 0.032*** | 0.022*** | -0.028*** | -0.005 |
|  | (0.001) | (0.004) | (0.002) | (0.004) | (0.000) | (0.002) |
|  |  |  |  |  |  |  |
| 1980-1984 | -0.005* | 0.020** | -0.002 | -0.006 | -0.030*** | -0.009** |
|  | (0.002) | (0.005) | (0.002) | (0.004) | (0.001) | (0.003) |
|  |  |  |  |  |  |  |
| 1985-1989 | -0.006* | 0.043*** | -0.047*** | -0.026*** | -0.041*** | -0.007 |
|  | (0.002) | (0.006) | (0.003) | (0.004) | (0.001) | (0.003) |
|  |  |  |  |  |  |  |
| 1990-1994 | 0.009* | 0.057*** | -0.056*** | -0.044*** | -0.035*** | -0.001 |
|  | (0.003) | (0.007) | (0.004) | (0.003) | (0.003) | (0.004) |
|  |  |  |  |  |  |  |
| 1995-1999 | 0.028*** | 0.071*** | -0.074*** | -0.074*** | -0.038** | -0.010 |
|  | (0.005) | (0.007) | (0.005) | (0.003) | (0.007) | (0.008) |
|  |  |  |  |  |  |  |
| Age at Migration: |  |  |  |  |  |  |
|  |  |  |  |  |  |  |
| 4-8 | -0.005 | -0.015 | -0.003 | -0.005 | -0.001 | -0.008 |
|  | (0.007) | (0.009) | (0.014) | (0.011) | (0.005) | (0.006) |
|  |  |  |  |  |  |  |
| 9-13 | -0.047** | -0.060** | -0.046* | -0.042* | -0.024** | -0.033** |
|  | (0.010) | (0.013) | (0.018) | (0.013) | (0.007) | (0.009) |
|  |  |  |  |  |  |  |
| 14-15 | -0.129*** | -0.131*** | -0.098*** | -0.080*** | -0.086*** | -0.089*** |
|  | (0.014) | (0.015) | (0.018) | (0.012) | (0.012) | (0.013) |
|  |  |  |  |  |  |  |
| 16-17 | -0.189*** | -0.180*** | -0.125*** | -0.095*** | -0.143*** | -0.140*** |
|  | (0.016) | (0.015) | (0.018) | (0.014) | (0.016) | (0.016) |
|  |  |  |  |  |  |  |
| Birthplace | No | Yes | No | Yes | No | Yes |
| Mean | 0.899 | 0.899 | 0.260 | 0.260 | 0.913 | 0.913 |
| Observations | 7,254,358 | 7,254,358 | 7,254,358 | 7,254,358 | 121,644 | 121,644 |
| R­2 | 0.072 | 0.076 | 0.032 | 0.035 | 0.050 | 0.135 |

Notes: Dependent variable for all columns is binary, and equals one if the worker is at least a high school graduate and zero otherwise (columns 1-2), equals one if the worker is at least a college graduate and zero otherwise (columns 3-4), and equals one if the worker reports speaking English at least well and zero otherwise (columns 5-6). Omitted categories are 1965-69 cohort and 0-3 age at migration. Birthplace measured using detailed Census code. All specifications include years since migration, years since migration squared, and a constant; columns (1-4) include survey year, age (introduced as a third-order polynomial) and fully interacted with survey year, and an immigrant dummy variable. Row “Mean” shows the mean of the dependent variable. Sources: 1980, 1990, and 2000 Census and 2009-2011 ACS. Standard errors in parentheses, and are clustered at the immigrant cohort level.

Table WA14: Ordered Logit Model, Educational Attainment and English Language Proficiency

|  | Education | | English Proficiency | |
| --- | --- | --- | --- | --- |
|  | (1) | (2) | (3) | (4) |
| Cohort: |  |  |  |  |
|  |  |  |  |  |
| 1960-1964 | 0.124*** | 0.092*** | 0.217*** | 0.159*** |
|  | (0.006) | (0.020) | (0.006) | (0.008) |
|  |  |  |  |  |
| 1970-1974 | -0.052*** | 0.073*** | -0.108*** | 0.048** |
|  | (0.005) | (0.022) | (0.005) | (0.017) |
|  |  |  |  |  |
| 1975-1979 | 0.022** | 0.075*** | -0.240*** | -0.010 |
|  | (0.007) | (0.021) | (0.007) | (0.025) |
|  |  |  |  |  |
| 1980-1984 | -0.080*** | -0.029 | -0.269*** | -0.037 |
|  | (0.012) | (0.028) | (0.006) | (0.028) |
|  |  |  |  |  |
| 1985-1989 | -0.264*** | -0.044 | -0.347*** | -0.015 |
|  | (0.017) | (0.031) | (0.006) | (0.022) |
|  |  |  |  |  |
| 1990-1994 | -0.279*** | -0.086** | -0.364*** | 0.044 |
|  | (0.025) | (0.032) | (0.010) | (0.023) |
|  |  |  |  |  |
| 1995-1999 | -0.264*** | -0.127*** | -0.278*** | 0.093*** |
|  | (0.036) | (0.030) | (0.029) | (0.024) |
|  |  |  |  |  |
| Age at Migration: |  |  |  |  |
|  |  |  |  |  |
| 4-8 | -0.025 | -0.083 | -0.182*** | -0.268*** |
|  | (0.052) | (0.050) | (0.036) | (0.050) |
|  |  |  |  |  |
| 9-13 | -0.275*** | -0.357*** | -0.604*** | -0.869*** |
|  | (0.076) | (0.068) | (0.040) | (0.081) |
|  |  |  |  |  |
| 14-15 | -0.718*** | -0.740*** | -1.104*** | -1.504*** |
|  | (0.087) | (0.073) | (0.043) | (0.102) |
|  |  |  |  |  |
| 16-17 | -1.057*** | -0.980*** | -1.426*** | -1.841*** |
|  | (0.086) | (0.072) | (0.052) | (0.099) |
| cut1 |  |  |  |  |
| Constant | -2.274*** | -2.285*** | -4.449*** | -8.114*** |
|  | (0.020) | (0.008) | (0.154) | (0.271) |
| cut2 |  |  |  |  |
| Constant | -0.155*** | -0.156*** | -2.903*** | -6.472*** |
|  | (0.001) | (0.002) | (0.131) | (0.243) |
| cut3 |  |  |  |  |
| Constant | 1.192*** | 1.196*** | -1.660*** | -5.049*** |
|  | (0.003) | (0.002) | (0.145) | (0.256) |
| cut4 |  |  |  |  |
| Constant | 2.433*** | 2.440*** | 0.828*** | -1.584*** |
|  | (0.001) | (0.009) | (0.155) | (0.267) |
|  |  |  |  |  |
| Birthplace | No | Yes | No | Yes |
| Observations | 7,254,358 | 7,254,358 | 121,644 | 121,644 |

Notes: Dependent variable in columns (1-2) is educational attainment, and is categorical, taking values between 1 for high school dropout, and 5 for post college, and in columns (3-4) is English language proficiency, and is categorical, taking values between 1 for Does Not Speak English, and 5 for Speaks Only English. Omitted categories are 1965-69 cohort and 0-3 age at migration. Birthplace measured using detailed Census code. All specifications include years since migration, years since migration squared, and a constant, while columns (1-2) also include survey year, an immigrant dummy variable, and age (introduced as a third-order polynomial) and fully interacted with survey year. Sources: 1980, 1990, and 2000 Census and 2009-2011 ACS. Standard errors in parentheses, and are clustered at the immigrant cohort level.

Table WA15: Parental Skill Levels of Childhood Immigrants, by Cohort and Years Since Migration

| **Panel A: Log Weekly Earnings** | | | | |
| --- | --- | --- | --- | --- |
|  | Years Since Migration | | | |
|  | (1) | (2) | (3) | (4) |
|  | 11-15 | 21-25 | 31-35 | 41-45 |
| 1965-1969 | -0.289 | -0.248 | -0.251 | -0.253 |
|  |  |  |  |  |
| 1975-1979 | -0.415 | -0.398 | -0.393 |  |
|  |  |  |  |  |
| 1985-1989 | -0.501 | -0.475 |  |  |
|  |  |  |  |  |
| 1995-1999 | -0.407 |  |  |  |
| **Panel B: Some College+**   |  | Years Since Migration | | | | | --- | --- | --- | --- | --- | |  | (1) | (2) | (3) | (4) | |  | 11-15 | 21-25 | 31-35 | 41-45 | | 1965-1969 | -0.022 | 0.005 | 0.005 | 0.004 | |  |  |  |  |  | | 1975-1979 | -0.111 | -0.092 | -0.081 |  | |  |  |  |  |  | | 1985-1989 | -0.208 | -0.180 |  |  | |  |  |  |  |  | | 1995-1999 | -0.181 |  |  |  | | | | | |

Notes: Table shows the age-adjusted skill levels of the (potential) parents of childhood immigrants relative to natives, separately by cohort and years since migration. Panel A shows skills measured based on earnings, while panel B shows skills measured based on having at least some college education, both measured shortly after arrival. Sources: 1980, 1990, and 2000 Census and 2009-2011 ACS.

Table WA16: Parental Skill Levels of Childhood Immigrants, by Cohort and Age at Migration

| **Panel A: Log Weekly Earnings** | | | | | |
| --- | --- | --- | --- | --- | --- |
|  | Age at Migration | | | | |
|  | (1) | (2) | (3) | (4) | (5) |
|  | 0-3 | 4-8 | 9-13 | 14-15 | 16-17 |
| 1965-1969 | -0.209 | -0.211 | -0.254 | -0.278 | -0.299 |
|  |  |  |  |  |  |
| 1975-1979 | -0.371 | -0.376 | -0.390 | -0.414 | -0.416 |
|  |  |  |  |  |  |
| 1985-1989 |  | -0.457 | -0.459 | -0.486 | -0.512 |
|  |  |  |  |  |  |
| 1995-1999 |  |  |  | -0.397 | -0.415 |
| **Panel B: Some College+**   |  | Age at Migration | | | | | | --- | --- | --- | --- | --- | --- | |  | (1) | (2) | (3) | (4) | (5) | |  | 0-3 | 4-8 | 9-13 | 14-15 | 16-17 | | 1965-1969 | 0.057 | 0.034 | -0.001 | -0.017 | -0.027 | |  |  |  |  |  |  | | 1975-1979 | -0.057 | -0.066 | -0.080 | -0.111 | -0.110 | |  |  |  |  |  |  | | 1985-1989 |  | -0.162 | -0.164 | -0.201 | -0.213 | |  |  |  |  |  |  | | 1995-1999 |  |  |  | -0.174 | -0.187 | | | | | | |

Notes: Table shows the age-adjusted skill levels of the (potential) parents of childhood immigrants relative to natives, separately by cohort and age at migration group. Panel A shows skills measured based on earnings, while panel B shows skills measured based on having at least some college education, both measured shortly after arrival. Values for each age at migration group are based on the first time each group is observed in the labor market. Sources: 1980, 1990, and 2000 Census and 2009-2011 ACS.

Table WA17: OLS Regressions, Log Weekly Earnings, Educational Attainment, and English Language Proficiency, No YSM

|  | Log Earnings | | | Some College+ | | | English Very Well+ | | |
| --- | --- | --- | --- | --- | --- | --- | --- | --- | --- |
|  | (1) | (2) | (3) | (4) | (5) | (6) | (7) | (8) | (9) |
| Cohort: |  |  |  |  |  |  |  |  |  |
|  |  |  |  |  |  |  |  |  |  |
| 1960-1964 | -0.006 | -0.039*** | -0.012* | 0.040*** | 0.008 | 0.030*** | 0.031*** | 0.009** | 0.014*** |
|  | (0.003) | (0.007) | (0.004) | (0.005) | (0.007) | (0.006) | (0.001) | (0.002) | (0.001) |
|  |  |  |  |  |  |  |  |  |  |
| 1970-1974 | -0.027*** | 0.055** | 0.067*** | -0.035*** | 0.045** | 0.054*** | -0.021*** | 0.034*** | 0.037*** |
|  | (0.003) | (0.013) | (0.008) | (0.005) | (0.011) | (0.009) | (0.001) | (0.004) | (0.003) |
|  |  |  |  |  |  |  |  |  |  |
| 1975-1979 | -0.029** | 0.068*** | 0.052*** | -0.050** | 0.043* | 0.030* | -0.040*** | 0.022** | 0.018*** |
|  | (0.008) | (0.013) | (0.009) | (0.011) | (0.015) | (0.013) | (0.001) | (0.004) | (0.003) |
|  |  |  |  |  |  |  |  |  |  |
| 1980-1984 | -0.080*** | 0.055* | 0.067*** | -0.091*** | 0.040 | 0.050* | -0.039*** | 0.047*** | 0.049*** |
|  | (0.012) | (0.018) | (0.012) | (0.013) | (0.021) | (0.017) | (0.002) | (0.006) | (0.005) |
|  |  |  |  |  |  |  |  |  |  |
| 1985-1989 | -0.148*** | 0.004 | 0.021 | -0.149*** | -0.003 | 0.011 | -0.051*** | 0.045*** | 0.048*** |
|  | (0.016) | (0.020) | (0.015) | (0.016) | (0.023) | (0.020) | (0.003) | (0.007) | (0.007) |
|  |  |  |  |  |  |  |  |  |  |
| 1990-1994 | -0.198*** | -0.084*** | -0.022 | -0.173*** | -0.062* | -0.012 | -0.045*** | 0.020* | 0.033** |
|  | (0.019) | (0.016) | (0.016) | (0.017) | (0.019) | (0.020) | (0.004) | (0.007) | (0.007) |
|  |  |  |  |  |  |  |  |  |  |
| 1995-1999 | -0.182*** | -0.081** | -0.020 | -0.191*** | -0.093** | -0.044 | -0.025* | 0.030* | 0.042** |
|  | (0.018) | (0.017) | (0.016) | (0.021) | (0.022) | (0.024) | (0.010) | (0.011) | (0.011) |
|  |  |  |  |  |  |  |  |  |  |
| Parental Log Earnings |  | 0.589*** | -0.118* |  | 0.570*** | -0.006 |  | 0.432*** | 0.285*** |
|  | (0.107) | (0.044) |  | (0.071) | (0.038) |  | (0.023) | (0.016) |
|  |  |  |  |  |  |  |  |  |  |
| Parent Some College+ |  |  | 0.947*** |  |  | 0.770*** |  |  | 0.197*** |
|  |  | (0.076) |  |  | (0.035) |  |  | (0.016) |
| Observations | 7,254,358 | 7,254,358 | 7,254,358 | 7,254,358 | 7,254,358 | 7,254,358 | 121,644 | 121,644 | 121,644 |
| R­2 | 0.022 | 0.022 | 0.023 | 0.079 | 0.080 | 0.081 | 0.094 | 0.157 | 0.162 |

Notes: Dependent variable is log weekly earnings in 2010 dollars in columns (1-3); in columns (4-9) it is binary, and equals one if the worker has at least some college education and zero otherwise (columns 4-6), and equals one if the worker reports speaking English very well or only English and zero otherwise (columns 7-9). Omitted category is the 1965-69 cohort. All specifications include a constant; columns (1-6) include survey year, age (introduced as a third-order polynomial) and fully interacted with survey year and immigrant status, and an immigrant dummy variable. Sources: 1980, 1990, and 2000 Census and 2009-2011 ACS. Standard errors in parentheses, and are clustered at the immigrant cohort level.

Table WA18: OLS Regressions, Log Weekly Earnings, Non-Mexico and Mexico

|  | (1) | (2) |
| --- | --- | --- |
|  | Non-Mexico | Mexico |
| Cohort: |  |  |
|  |  |  |
| 1960-1964 | 0.009*** | 0.027*** |
|  | (0.001) | (0.003) |
|  |  |  |
| 1970-1974 | 0.051*** | -0.064*** |
|  | (0.002) | (0.003) |
|  |  |  |
| 1975-1979 | 0.094*** | -0.142*** |
|  | (0.002) | (0.005) |
|  |  |  |
| 1980-1984 | 0.024*** | -0.192*** |
|  | (0.004) | (0.006) |
|  |  |  |
| 1985-1989 | 0.004 | -0.245*** |
|  | (0.006) | (0.007) |
|  |  |  |
| 1990-1994 | -0.029* | -0.315*** |
|  | (0.009) | (0.005) |
|  |  |  |
| 1995-1999 | -0.055* | -0.341*** |
|  | (0.017) | (0.010) |
|  |  |  |
| Age at Migration: |  |  |
|  |  |  |
| 4-8 | 0.003 | -0.040** |
|  | (0.020) | (0.010) |
|  |  |  |
| 9-13 | -0.048 | -0.143*** |
|  | (0.028) | (0.023) |
|  |  |  |
| 14-15 | -0.116** | -0.277*** |
|  | (0.034) | (0.018) |
|  |  |  |
| 16-17 | -0.151** | -0.337*** |
|  | (0.032) | (0.021) |
| Observations | 7,219,845 | 7,167,227 |
| R­2 | 0.023 | 0.022 |

Notes: Dependent variable is log weekly earnings in 2010 dollars. Omitted categories are 1965-69 cohort and 0-3 age at migration. Column (1) includes only non-Mexican immigrants, while column (2) includes only Mexican immigrants, in addition to native workers (who appear in both estimations). All specifications include survey year, an immigrant dummy variable, age (introduced as a third-order polynomial) and fully interacted with survey year, years since migration, years since migration squared, and a constant. Sources: 1980, 1990, and 2000 Census and 2009-2011 ACS. Standard errors in parentheses, and are clustered at the immigrant cohort level.

Table WA19: OLS Regressions, Log Weekly Earnings, Educational Attainment, and English Language Proficiency, Parental Education Measured Using HS Grad+

|  | Log Earnings | | | Some College+ | | | English Very Well+ | | |
| --- | --- | --- | --- | --- | --- | --- | --- | --- | --- |
|  | (1) | (2) | (3) | (4) | (5) | (6) | (7) | (8) | (9) |
| Cohort: |  |  |  |  |  |  |  |  |  |
|  |  |  |  |  |  |  |  |  |  |
| 1960-1964 | 0.017*** | -0.013* | 0.007 | 0.034*** | 0.005 | 0.022*** | 0.031*** | 0.009** | 0.016*** |
|  | (0.001) | (0.006) | (0.003) | (0.001) | (0.004) | (0.002) | (0.001) | (0.002) | (0.001) |
|  |  |  |  |  |  |  |  |  |  |
| 1970-1974 | -0.019*** | 0.056** | 0.065*** | -0.020*** | 0.053*** | 0.060*** | -0.021*** | 0.034*** | 0.037*** |
|  | (0.002) | (0.013) | (0.011) | (0.001) | (0.009) | (0.007) | (0.001) | (0.004) | (0.003) |
|  |  |  |  |  |  |  |  |  |  |
| 1975-1979 | -0.013** | 0.071** | 0.053** | -0.021*** | 0.060*** | 0.045*** | -0.040*** | 0.022** | 0.016** |
|  | (0.003) | (0.015) | (0.011) | (0.001) | (0.010) | (0.007) | (0.001) | (0.004) | (0.003) |
|  |  |  |  |  |  |  |  |  |  |
| 1980-1984 | -0.051*** | 0.067* | 0.014 | -0.049*** | 0.065** | 0.018 | -0.039*** | 0.047*** | 0.030*** |
|  | (0.005) | (0.021) | (0.014) | (0.002) | (0.014) | (0.010) | (0.002) | (0.006) | (0.004) |
|  |  |  |  |  |  |  |  |  |  |
| 1985-1989 | -0.121*** | 0.009 | -0.035 | -0.099*** | 0.027 | -0.011 | -0.051*** | 0.045*** | 0.031** |
|  | (0.007) | (0.025) | (0.019) | (0.003) | (0.016) | (0.012) | (0.003) | (0.007) | (0.007) |
|  |  |  |  |  |  |  |  |  |  |
| 1990-1994 | -0.166*** | -0.076** | -0.101*** | -0.115*** | -0.028 | -0.049** | -0.045*** | 0.020* | 0.012 |
|  | (0.010) | (0.020) | (0.016) | (0.005) | (0.012) | (0.010) | (0.004) | (0.007) | (0.007) |
|  |  |  |  |  |  |  |  |  |  |
| 1995-1999 | -0.184*** | -0.109** | -0.133*** | -0.130*** | -0.057** | -0.078*** | -0.025* | 0.030* | 0.022 |
|  | (0.017) | (0.024) | (0.021) | (0.010) | (0.013) | (0.013) | (0.010) | (0.011) | (0.011) |
|  |  |  |  |  |  |  |  |  |  |
| Parental Log Earnings |  | 0.591*** | -0.199** |  | 0.571*** | -0.113* |  | 0.432*** | 0.182*** |
|  | (0.107) | (0.054) |  | (0.071) | (0.038) |  | (0.023) | (0.025) |
|  |  |  |  |  |  |  |  |  |  |
| Parent HS+ |  |  | 0.962*** |  |  | 0.833*** |  |  | 0.305*** |
|  |  |  | (0.077) |  |  | (0.036) |  |  | (0.031) |
| Mean |  |  |  | 0.555 | 0.555 | 0.555 | 0.765 | 0.765 | 0.765 |
| Observations | 7,254,358 | 7,254,358 | 7,254,358 | 7,254,358 | 7,254,358 | 7,254,358 | 121,644 | 121,644 | 121,644 |
| R­2 | 0.022 | 0.022 | 0.023 | 0.079 | 0.080 | 0.082 | 0.094 | 0.157 | 0.172 |

Notes: Dependent variable is log weekly earnings in 2010 dollars in columns (1-3); in columns (4-9) it is binary, and equals one if the worker has at least some college education and zero otherwise (columns 4-6), and equals one if the worker reports speaking English very well or only English and zero otherwise (columns 7-9). Omitted category is the 1965-69 cohort. All specifications include years since migration, years since migration squared, and a constant; columns (1-6) include survey year, age (introduced as a third-order polynomial) and fully interacted with survey year, and an immigrant dummy variable. Row “Mean” shows the mean of the dependent variable. Sources: 1980, 1990, and 2000 Census and 2009-2011 ACS. Standard errors in parentheses, and are clustered at the immigrant cohort level.

Table WA20: OLS Regressions, Log Weekly Earnings, Educational Attainment, and English Language Proficiency, Parental Education Measured Using College Grad+

|  | Log Earnings | | | Some College+ | | | English Very Well+ | | |
| --- | --- | --- | --- | --- | --- | --- | --- | --- | --- |
|  | (1) | (2) | (3) | (4) | (5) | (6) | (7) | (8) | (9) |
| Cohort: |  |  |  |  |  |  |  |  |  |
|  |  |  |  |  |  |  |  |  |  |
| 1960-1964 | 0.017*** | -0.013* | 0.007 | 0.034*** | 0.005 | 0.020*** | 0.031*** | 0.009** | 0.012*** |
|  | (0.001) | (0.006) | (0.003) | (0.001) | (0.004) | (0.002) | (0.001) | (0.002) | (0.002) |
|  |  |  |  |  |  |  |  |  |  |
| 1970-1974 | -0.019*** | 0.056** | 0.040*** | -0.020*** | 0.053*** | 0.040*** | -0.021*** | 0.034*** | 0.032*** |
|  | (0.002) | (0.013) | (0.008) | (0.001) | (0.009) | (0.006) | (0.001) | (0.004) | (0.003) |
|  |  |  |  |  |  |  |  |  |  |
| 1975-1979 | -0.013** | 0.071** | 0.046** | -0.021*** | 0.060*** | 0.041*** | -0.040*** | 0.022** | 0.019** |
|  | (0.003) | (0.015) | (0.009) | (0.001) | (0.010) | (0.006) | (0.001) | (0.004) | (0.003) |
|  |  |  |  |  |  |  |  |  |  |
| 1980-1984 | -0.051*** | 0.067* | 0.027 | -0.049*** | 0.065** | 0.034** | -0.039*** | 0.047*** | 0.042*** |
|  | (0.005) | (0.021) | (0.013) | (0.002) | (0.014) | (0.009) | (0.002) | (0.006) | (0.005) |
|  |  |  |  |  |  |  |  |  |  |
| 1985-1989 | -0.121*** | 0.009 | -0.033 | -0.099*** | 0.027 | -0.005 | -0.051*** | 0.045*** | 0.039*** |
|  | (0.007) | (0.025) | (0.017) | (0.003) | (0.016) | (0.011) | (0.003) | (0.007) | (0.006) |
|  |  |  |  |  |  |  |  |  |  |
| 1990-1994 | -0.166*** | -0.076** | -0.107*** | -0.115*** | -0.028 | -0.051*** | -0.045*** | 0.020* | 0.016* |
|  | (0.010) | (0.020) | (0.015) | (0.005) | (0.012) | (0.009) | (0.004) | (0.007) | (0.007) |
|  |  |  |  |  |  |  |  |  |  |
| 1995-1999 | -0.184*** | -0.109** | -0.143*** | -0.130*** | -0.057** | -0.083*** | -0.025* | 0.030* | 0.025 |
|  | (0.017) | (0.024) | (0.021) | (0.010) | (0.013) | (0.012) | (0.010) | (0.011) | (0.011) |
|  |  |  |  |  |  |  |  |  |  |
| Parental Log Earnings |  | 0.591*** | 0.054 |  | 0.571*** | 0.162* |  | 0.432*** | 0.363*** |
|  | (0.107) | (0.054) |  | (0.071) | (0.050) |  | (0.023) | (0.020) |
|  |  |  |  |  |  |  |  |  |  |
| Parent College Grad+ |  |  | 0.912*** |  |  | 0.695*** |  |  | 0.117*** |
|  |  | (0.056) |  |  | (0.034) |  |  | (0.013) |
| Mean |  |  | 6.268 | 0.555 | 0.555 | 0.555 | 0.765 | 0.765 | 0.765 |
| Observations | 7,254,358 | 7,254,358 | 7,254,358 | 7,254,358 | 7,254,358 | 7,254,358 | 121,644 | 121,644 | 121,644 |
| R­2 | 0.022 | 0.022 | 0.023 | 0.079 | 0.080 | 0.081 | 0.094 | 0.157 | 0.159 |

Notes: Dependent variable is log weekly earnings in 2010 dollars in columns (1-3); in columns (4-9) it is binary, and equals one if the worker has at least some college education and zero otherwise (columns 4-6), and equals one if the worker reports speaking English very well or only English and zero otherwise (columns 7-9). Omitted category is the 1965-69 cohort. All specifications include years since migration, years since migration squared, and a constant; columns (1-6) include survey year, age (introduced as a third-order polynomial) and fully interacted with survey year, and an immigrant dummy variable. Row “Mean” shows the mean of the dependent variable. Sources: 1980, 1990, and 2000 Census and 2009-2011 ACS. Standard errors in parentheses, and are clustered at the immigrant cohort level.

Table WA21: OLS Regressions, Log Weekly Earnings, Educational Attainment, and English Language Proficiency, with Log GDP Per Capita of Parental Birthplace

|  | Log Earnings | | | Some College+ | | | English Very Well+ | | |
| --- | --- | --- | --- | --- | --- | --- | --- | --- | --- |
|  | (1) | (2) | (3) | (4) | (5) | (6) | (7) | (8) | (9) |
| Cohort: |  |  |  |  |  |  |  |  |  |
|  |  |  |  |  |  |  |  |  |  |
| 1970-1974 | -0.004 | 0.012 | 0.022** | 0.002* | 0.014*** | 0.020*** | 0.019*** | 0.020*** | 0.020*** |
|  | (0.006) | (0.005) | (0.005) | (0.001) | (0.001) | (0.002) | (0.001) | (0.002) | (0.002) |
|  |  |  |  |  |  |  |  |  |  |
| 1980-1984 | -0.044*** | -0.044*** | 0.027* | -0.031*** | -0.031*** | 0.031*** | 0.001 | 0.000 | 0.041*** |
|  | (0.005) | (0.004) | (0.007) | (0.001) | (0.001) | (0.003) | (0.001) | (0.001) | (0.003) |
|  |  |  |  |  |  |  |  |  |  |
| 1985-1989 | -0.114*** | -0.094*** | -0.015 | -0.082*** | -0.067*** | 0.004 | -0.013** | -0.012** | 0.037*** |
|  | (0.008) | (0.007) | (0.013) | (0.002) | (0.003) | (0.005) | (0.002) | (0.003) | (0.004) |
|  |  |  |  |  |  |  |  |  |  |
| 1990-1994 | -0.158*** | -0.136*** | -0.078** | -0.100*** | -0.083*** | -0.036** | -0.009 | -0.008 | 0.014 |
|  | (0.011) | (0.010) | (0.015) | (0.004) | (0.005) | (0.007) | (0.005) | (0.005) | (0.006) |
|  |  |  |  |  |  |  |  |  |  |
| 1995-1999 | -0.173*** | -0.141*** | -0.104** | -0.112*** | -0.089** | -0.060* | 0.002 | 0.004 | 0.014 |
|  | (0.017) | (0.019) | (0.022) | (0.016) | (0.019) | (0.019) | (0.014) | (0.015) | (0.015) |
|  |  |  |  |  |  |  |  |  |  |
| Log Parental GDP Per Cap. |  | -0.116*** | -0.048** |  | -0.085*** | -0.031** |  | -0.006 | 0.014 |
|  | (0.002) | (0.011) |  | (0.005) | (0.007) |  | (0.005) | (0.008) |
|  |  |  |  |  |  |  |  |  |  |
| Parent Log Earnings |  |  | -0.015 |  |  | 0.053* |  |  | 0.193*** |
|  |  | (0.016) |  |  | (0.017) |  |  | (0.015) |
|  |  |  |  |  |  |  |  |  |  |
| Parent Some College+ |  |  | 0.905*** |  |  | 0.729*** |  |  | 0.296*** |
|  |  | (0.071) |  |  | (0.035) |  |  | (0.023) |
| Mean |  |  |  | 0.555 | 0.555 | 0.555 | 0.730 | 0.730 | 0.730 |
| Observations | 7,211,831 | 7,211,831 | 7,211,797 | 7,211,831 | 7,211,831 | 7,211,797 | 79,117 | 79,117 | 79,083 |
| R­2 | 0.022 | 0.022 | 0.023 | 0.079 | 0.079 | 0.081 | 0.092 | 0.092 | 0.162 |

Notes: Dependent variable is log weekly earnings in 2010 dollars in columns (1-3); in columns (4-9) it is binary, and equals one if the worker has at least some college education and zero otherwise (columns 4-6), and equals one if the worker reports speaking English very well or only English and zero otherwise (columns 7-9). Omitted category is the 1965-69 cohort. All specifications include years since migration, years since migration squared, and a constant; columns (1-6) include survey year, age (introduced as a third-order polynomial) and fully interacted with survey year, and an immigrant dummy variable. Row “Mean” shows the mean of the dependent variable. Sources: 1980, 1990, and 2000 Census and 2009-2011 ACS. Standard errors in parentheses, and are clustered at the immigrant cohort level.

Table WA22: OLS Regressions, Log Weekly Earnings, Educational Attainment, and English Language Proficiency, with Log of Parental Cohort Size

|  | Log Earnings | | | Some College+ | | | English Very Well+ | | |
| --- | --- | --- | --- | --- | --- | --- | --- | --- | --- |
|  | (1) | (2) | (3) | (4) | (5) | (6) | (7) | (8) | (9) |
| Cohort: |  |  |  |  |  |  |  |  |  |
|  |  |  |  |  |  |  |  |  |  |
| 1960-1964 | 0.017*** | 0.018*** | 0.015** | 0.034*** | 0.034*** | 0.027*** | 0.031*** | 0.032*** | 0.017*** |
|  | (0.001) | (0.001) | (0.003) | (0.001) | (0.001) | (0.002) | (0.001) | (0.001) | (0.001) |
|  |  |  |  |  |  |  |  |  |  |
| 1970-1974 | -0.019*** | 0.082*** | 0.085*** | -0.020*** | 0.069*** | 0.074*** | -0.021*** | 0.040*** | 0.048*** |
|  | (0.002) | (0.013) | (0.012) | (0.001) | (0.010) | (0.008) | (0.001) | (0.006) | (0.004) |
|  |  |  |  |  |  |  |  |  |  |
| 1975-1979 | -0.013** | 0.079*** | 0.069*** | -0.021*** | 0.059*** | 0.056*** | -0.040*** | 0.016* | 0.028*** |
|  | (0.003) | (0.012) | (0.011) | (0.001) | (0.009) | (0.008) | (0.001) | (0.005) | (0.004) |
|  |  |  |  |  |  |  |  |  |  |
| 1980-1984 | -0.051*** | 0.117*** | 0.106*** | -0.049*** | 0.098*** | 0.092*** | -0.039*** | 0.062*** | 0.068*** |
|  | (0.005) | (0.021) | (0.020) | (0.002) | (0.016) | (0.014) | (0.002) | (0.009) | (0.007) |
|  |  |  |  |  |  |  |  |  |  |
| 1985-1989 | -0.121*** | 0.074* | 0.059* | -0.099*** | 0.073** | 0.062** | -0.051*** | 0.068*** | 0.071*** |
|  | (0.007) | (0.026) | (0.024) | (0.003) | (0.019) | (0.016) | (0.003) | (0.011) | (0.008) |
|  |  |  |  |  |  |  |  |  |  |
| 1990-1994 | -0.166*** | 0.085* | 0.037 | -0.115*** | 0.106** | 0.056* | -0.045*** | 0.107*** | 0.069*** |
|  | (0.010) | (0.034) | (0.030) | (0.005) | (0.024) | (0.021) | (0.004) | (0.014) | (0.012) |
|  |  |  |  |  |  |  |  |  |  |
| 1995-1999 | -0.184*** | 0.063 | 0.006 | -0.130*** | 0.088** | 0.028 | -0.025* | 0.124*** | 0.079*** |
|  | (0.017) | (0.038) | (0.033) | (0.010) | (0.025) | (0.022) | (0.010) | (0.016) | (0.014) |
|  |  |  |  |  |  |  |  |  |  |
| Log Parent Cohort Size |  | -0.126*** | -0.036* |  | -0.111*** | -0.024 |  | -0.077*** | -0.024* |
|  | (0.017) | (0.012) |  | (0.012) | (0.011) |  | (0.006) | (0.007) |
|  |  |  |  |  |  |  |  |  |  |
| Parental Log Earnings |  |  | -0.173* |  |  | -0.042 |  |  | 0.248*** |
|  |  | (0.056) |  |  | (0.047) |  |  | (0.032) |
|  |  |  |  |  |  |  |  |  |  |
| Parent Some College+ |  |  | 0.895*** |  |  | 0.735*** |  |  | 0.162*** |
|  |  | (0.066) |  |  | (0.025) |  |  | (0.012) |
| Mean |  |  |  | 0.555 | 0.555 | 0.555 | 0.765 | 0.765 | 0.765 |
| Observations | 7,254,358 | 7,254,358 | 7,254,358 | 7,254,358 | 7,254,358 | 7,254,358 | 121,644 | 121,644 | 121,644 |
| R­2 | 0.022 | 0.022 | 0.023 | 0.079 | 0.080 | 0.081 | 0.094 | 0.134 | 0.165 |

Notes: Dependent variable is log weekly earnings in 2010 dollars in columns (1-3); in columns (4-9) it is binary, and equals one if the worker has at least some college education and zero otherwise (columns 4-6), and equals one if the worker reports speaking English very well or only English and zero otherwise (columns 7-9). Omitted category is the 1965-69 cohort. All specifications include years since migration, years since migration squared, and a constant; columns (1-6) include survey year, age (introduced as a third-order polynomial) and fully interacted with survey year, and an immigrant dummy variable. Row “Mean” shows the mean of the dependent variable. Sources: 1980, 1990, and 2000 Census and 2009-2011 ACS. Standard errors in parentheses, and are clustered at the immigrant cohort level.

Table WA23: OLS Regressions, Log Weekly Earnings, Educational Attainment, and English Language Proficiency, Pre-Census Cohorts Only

|  | Log Earnings | | | Some College+ | | | English Very Well+ | | |
| --- | --- | --- | --- | --- | --- | --- | --- | --- | --- |
|  | (1) | (2) | (3) | (4) | (5) | (6) | (7) | (8) | (9) |
| Cohort: |  |  |  |  |  |  |  |  |  |
|  |  |  |  |  |  |  |  |  |  |
| 1975-1979 | -0.010 | 0.067* | 0.056** | -0.019*** | 0.056** | 0.048*** | -0.038*** | 0.021* | 0.018* |
|  | (0.004) | (0.023) | (0.012) | (0.002) | (0.011) | (0.004) | (0.002) | (0.006) | (0.003) |
|  |  |  |  |  |  |  |  |  |  |
| 1985-1989 | -0.114*** | -0.002 | 0.024 | -0.095*** | 0.014 | 0.036* | -0.046*** | 0.039* | 0.046** |
|  | (0.006) | (0.035) | (0.024) | (0.004) | (0.016) | (0.010) | (0.001) | (0.007) | (0.007) |
|  |  |  |  |  |  |  |  |  |  |
| 1995-1999 | -0.165*** | -0.125** | -0.028 | -0.125** | -0.084** | -0.005 | -0.014 | 0.017 | 0.041* |
|  | (0.007) | (0.019) | (0.025) | (0.015) | (0.016) | (0.017) | (0.012) | (0.011) | (0.012) |
|  |  |  |  |  |  |  |  |  |  |
| Parent Log Earnings |  | 0.578* | -0.123* |  | 0.566** | -0.009 |  | 0.441*** | 0.265** |
|  | (0.151) | (0.039) |  | (0.091) | (0.035) |  | (0.033) | (0.028) |
|  |  |  |  |  |  |  |  |  |  |
| Parent Some College+ |  |  | 0.989** |  |  | 0.811*** |  |  | 0.247* |
|  |  | (0.149) |  |  | (0.075) |  |  | (0.046) |
| Mean |  |  |  | 0.555 | 0.555 | 0.555 | 0.747 | 0.747 | 0.747 |
| Observations | 7,190,781 | 7,190,781 | 7,190,781 | 7,190,781 | 7,190,781 | 7,190,781 | 58,084 | 58,067 | 58,067 |
| R­2 | 0.022 | 0.022 | 0.022 | 0.079 | 0.080 | 0.080 | 0.101 | 0.164 | 0.173 |

Notes: Dependent variable is log weekly earnings in 2010 dollars in columns (1-3); in columns (4-9) it is binary, and equals one if the worker has at least some college education and zero otherwise (columns 4-6), and equals one if the worker reports speaking English very well or only English and zero otherwise (columns 7-9). Omitted category is the 1965-69 cohort. All specifications include years since migration, years since migration squared, and a constant; columns (1-6) include survey year, age (introduced as a third-order polynomial) and fully interacted with survey year, and an immigrant dummy variable. Row “Mean” shows the mean of the dependent variable. Sources: 1980, 1990, and 2000 Census and 2009-2011 ACS. Standard errors in parentheses, and are clustered at the immigrant cohort level.

Table WA24: OLS Regressions, Log Weekly Earnings, Educational Attainment, and English Language Proficiency, Pre-Census Cohorts Only, Parents with Children Only

|  | Log Earnings | | | Some College+ | | | English Very Well+ | | |
| --- | --- | --- | --- | --- | --- | --- | --- | --- | --- |
|  | (1) | (2) | (3) | (4) | (5) | (6) | (7) | (8) | (9) |
| Cohort: |  |  |  |  |  |  |  |  |  |
|  |  |  |  |  |  |  |  |  |  |
| 1975-1979 | -0.010 | 0.046* | 0.048* | -0.019*** | 0.039** | 0.040*** | -0.038*** | 0.009 | 0.010 |
|  | (0.004) | (0.014) | (0.011) | (0.002) | (0.005) | (0.003) | (0.002) | (0.004) | (0.004) |
|  |  |  |  |  |  |  |  |  |  |
| 1985-1989 | -0.114*** | -0.022 | -0.009 | -0.095*** | -0.002 | 0.009 | -0.046*** | 0.030* | 0.034* |
|  | (0.006) | (0.024) | (0.020) | (0.004) | (0.008) | (0.009) | (0.001) | (0.005) | (0.006) |
|  |  |  |  |  |  |  |  |  |  |
| 1995-1999 | -0.166*** | -0.125** | -0.048 | -0.124** | -0.083** | -0.020 | -0.014 | 0.019 | 0.040 |
|  | (0.007) | (0.017) | (0.021) | (0.015) | (0.014) | (0.018) | (0.012) | (0.010) | (0.013) |
|  |  |  |  |  |  |  |  |  |  |
| Parent Log Earnings |  | 0.504** | -0.195** |  | 0.514*** | -0.059 |  | 0.419*** | 0.229** |
|  | (0.100) | (0.038) |  | (0.049) | (0.029) |  | (0.024) | (0.025) |
|  |  |  |  |  |  |  |  |  |  |
| Parent Some College+ |  |  | 1.022** |  |  | 0.839*** |  |  | 0.278* |
|  |  | (0.126) |  |  | (0.065) |  |  | (0.063) |
| Mean |  |  |  | 0.555 | 0.555 | 0.555 | 0.747 | 0.747 | 0.747 |
| Observations | 7,190,771 | 7,190,771 | 7,190,771 | 7,190,771 | 7,190,771 | 7,190,771 | 58,057 | 58,057 | 58,057 |
| R­2 | 0.022 | 0.022 | 0.022 | 0.079 | 0.080 | 0.080 | 0.101 | 0.161 | 0.173 |

Notes: Dependent variable is log weekly earnings in 2010 dollars in columns (1-3); in columns (4-9) it is binary, and equals one if the worker has at least some college education and zero otherwise (columns 4-6), and equals one if the worker reports speaking English very well or only English and zero otherwise (columns 7-9). Omitted category is the 1965-69 cohort. All specifications include years since migration, years since migration squared, and a constant; columns (1-6) include survey year, age (introduced as a third-order polynomial) and fully interacted with survey year, and an immigrant dummy variable. Row “Mean” shows the mean of the dependent variable. Sources: 1980, 1990, and 2000 Census and 2009-2011 ACS. Standard errors in parentheses, and are clustered at the immigrant cohort level.

Table WA25: OLS Regressions, Log Weekly Earnings, Educational Attainment, and English Language Proficiency, Pre-Census Cohorts Only, Parents with Children Only, Number of Children

|  | Log Earnings | | | Some College+ | | | English Very Well+ | | |
| --- | --- | --- | --- | --- | --- | --- | --- | --- | --- |
|  | (1) | (2) | (3) | (4) | (5) | (6) | (7) | (8) | (9) |
| Cohort: |  |  |  |  |  |  |  |  |  |
|  |  |  |  |  |  |  |  |  |  |
| 1975-1979 | -0.010 | 0.000 | 0.044* | -0.019*** | -0.009*** | 0.037*** | -0.038*** | -0.029** | 0.002 |
|  | (0.004) | (0.005) | (0.013) | (0.002) | (0.001) | (0.003) | (0.002) | (0.003) | (0.005) |
|  |  |  |  |  |  |  |  |  |  |
| 1985-1989 | -0.114*** | -0.178*** | -0.032 | -0.095*** | -0.155*** | -0.008 | -0.046*** | -0.097*** | -0.008 |
|  | (0.006) | (0.009) | (0.030) | (0.004) | (0.007) | (0.010) | (0.001) | (0.002) | (0.011) |
|  |  |  |  |  |  |  |  |  |  |
| 1995-1999 | -0.166*** | -0.292*** | -0.080 | -0.125** | -0.242*** | -0.045* | -0.014 | -0.115*** | -0.019 |
|  | (0.007) | (0.012) | (0.035) | (0.015) | (0.011) | (0.015) | (0.012) | (0.008) | (0.018) |
|  |  |  |  |  |  |  |  |  |  |
| Parent Number Children |  | -0.314** | -0.063 |  | -0.291*** | -0.048 |  | -0.250*** | -0.116** |
|  | (0.050) | (0.040) |  | (0.032) | (0.025) |  | (0.016) | (0.012) |
|  |  |  |  |  |  |  |  |  |  |
| Parent Log Earnings |  |  | -0.227** |  |  | -0.084** |  |  | 0.170** |
|  |  | (0.027) |  |  | (0.018) |  |  | (0.019) |
|  |  |  |  |  |  |  |  |  |  |
| Parent Some College+ |  |  | 0.991** |  |  | 0.815*** |  |  | 0.220* |
|  |  | (0.138) |  |  | (0.071) |  |  | (0.066) |
| Mean |  |  |  | 0.555 | 0.555 | 0.555 | 0.747 | 0.747 | 0.747 |
| Observations | 7,190,771 | 7,190,771 | 7,190,771 | 7,190,798 | 7,190,771 | 7,190,771 | 58,057 | 58,057 | 58,057 |
| R­2 | 0.022 | 0.022 | 0.022 | 0.079 | 0.079 | 0.080 | 0.101 | 0.152 | 0.180 |

Notes: Dependent variable is log weekly earnings in 2010 dollars in columns (1-3); in columns (4-9) it is binary, and equals one if the worker has at least some college education and zero otherwise (columns 4-6), and equals one if the worker reports speaking English very well or only English and zero otherwise (columns 7-9). Omitted category is the 1965-69 cohort. All specifications include years since migration, years since migration squared, and a constant; columns (1-6) include survey year, age (introduced as a third-order polynomial) and fully interacted with survey year, and an immigrant dummy variable. Row “Mean” shows the mean of the dependent variable. Sources: 1980, 1990, and 2000 Census and 2009-2011 ACS. Standard errors in parentheses, and are clustered at the immigrant cohort level.

Table WA26: OLS Regressions, Log Weekly Earnings, Educational Attainment and English Proficiency, With State Controls

|  | Log Earnings | | Some College+ | | English Very Well+ | |
| --- | --- | --- | --- | --- | --- | --- |
|  | (1) | (2) | (3) | (4) | (5) | (6) |
| Cohort: |  |  |  |  |  |  |
|  |  |  |  |  |  |  |
| 1960-1964 | 0.017*** | 0.023*** | 0.034*** | 0.035*** | 0.031*** | 0.033*** |
|  | (0.001) | (0.001) | (0.001) | (0.001) | (0.001) | (0.001) |
|  |  |  |  |  |  |  |
| 1970-1974 | -0.019*** | -0.030*** | -0.020*** | -0.026*** | -0.021*** | -0.008* |
|  | (0.002) | (0.002) | (0.001) | (0.002) | (0.001) | (0.003) |
|  |  |  |  |  |  |  |
| 1975-1979 | -0.013** | -0.020*** | -0.021*** | -0.029*** | -0.040*** | -0.016** |
|  | (0.003) | (0.003) | (0.001) | (0.002) | (0.001) | (0.004) |
|  |  |  |  |  |  |  |
| 1980-1984 | -0.051*** | -0.055*** | -0.049*** | -0.055*** | -0.039*** | -0.021*** |
|  | (0.005) | (0.005) | (0.002) | (0.002) | (0.002) | (0.003) |
|  |  |  |  |  |  |  |
| 1985-1989 | -0.121*** | -0.125*** | -0.099*** | -0.103*** | -0.051*** | -0.033*** |
|  | (0.007) | (0.008) | (0.003) | (0.003) | (0.003) | (0.003) |
|  |  |  |  |  |  |  |
| 1990-1994 | -0.166*** | -0.157*** | -0.115*** | -0.112*** | -0.045*** | -0.033*** |
|  | (0.010) | (0.010) | (0.005) | (0.005) | (0.004) | (0.005) |
|  |  |  |  |  |  |  |
| 1995-1999 | -0.184*** | -0.150*** | -0.130*** | -0.114*** | -0.025* | -0.019 |
|  | (0.017) | (0.017) | (0.010) | (0.010) | (0.010) | (0.010) |
|  |  |  |  |  |  |  |
| Age at Migration: |  |  |  |  |  |  |
|  |  |  |  |  |  |  |
| 4-8 | 0.008 | 0.005 | -0.007 | -0.006 | -0.012 | -0.018* |
|  | (0.014) | (0.014) | (0.008) | (0.008) | (0.006) | (0.007) |
|  |  |  |  |  |  |  |
| 9-13 | -0.050* | -0.060* | -0.056** | -0.056** | -0.092*** | -0.101*** |
|  | (0.020) | (0.019) | (0.012) | (0.012) | (0.011) | (0.012) |
|  |  |  |  |  |  |  |
| 14-15 | -0.150*** | -0.162*** | -0.139*** | -0.140*** | -0.222*** | -0.230*** |
|  | (0.027) | (0.026) | (0.014) | (0.013) | (0.019) | (0.020) |
|  |  |  |  |  |  |  |
| 16-17 | -0.208*** | -0.219*** | -0.196*** | -0.197*** | -0.306*** | -0.311*** |
|  | (0.027) | (0.026) | (0.012) | (0.012) | (0.021) | (0.021) |
|  |  |  |  |  |  |  |
| State | No | Yes | No | Yes | No | Yes |
| Mean |  |  | 0.555 | 0.555 | 0.765 | 0.765 |
| Observations | 7,254,358 | 7,254,358 | 7,254,358 | 7,254,358 | 121,644 | 121,644 |
| R­2 | 0.022 | 0.041 | 0.079 | 0.093 | 0.094 | 0.121 |

Notes: Dependent variable is log weekly earnings in 2010 dollars in columns (1-2); in columns (3-6) it is binary, and equals one if the worker has at least some college education and zero otherwise (columns 3-4), and equals one if the worker reports speaking English very well or only English and zero otherwise (columns 5-6). Omitted category is the 1965-69 cohort and 0-3 age at migration. All specifications include years since migration, years since migration squared, and a constant; columns (1-4) include survey year, age (introduced as a third-order polynomial) and fully interacted with survey year, and an immigrant dummy variable. Row “Mean” shows the mean of the dependent variable. Sources: 1980, 1990, and 2000 Census and 2009-2011 ACS. Standard errors in parentheses, and are clustered at the immigrant cohort level.

1. I explore the relationship between the characteristics of the parental cohort and the labor-force participation of both male and female childhood immigrants by repeating the estimations shown in Table 7 but where the dependent variable is changed to a binary variable that equals one if the individual is in the labor force and zero otherwise and where the sample no longer excludes individuals who report zero earned income or weeks worked. I find that, although there is a mild, positive relationship between parental earnings and male labor-force participation, there is no statistically significant relationship between parental educational attainment and male labor-force participation. More importantly, there is a strong, positive relationship between both parental earnings and educational attainment on female labor-force participation. Results available upon request. [↑](#footnote-ref-1)
